# Supplementary material for: A Stop-Gain Mutation within MLPH Is Responsible for the Lilac Dilution Observed in Jacob Sheep
Source: Genes (Basel). 2020 Jun 4;11(6):618. doi: 10.3390/genes11060618 (PMC7349772; doi:10.3390/genes11060618)
Supplement: Supplementary file 1 [file genes-11-00618-s001.csv]

Table S1. SNVs discovered from WGS near MLPH, RAB27A, and MYO5A
chromosome	position	reference	alternate	Gene (MLPH,RAB27A, or MYO5A) "." Indicates not one of these three genes	Protein Impact Level as predicted by snpEff (LOW,MODERATE,or HIGH) "." Indicates no predicted impact	Variant Type "." indicates intronic/intergenic variant	Amino Acid Position	Original AA/New AA	Codon Change
NC_019458.2	3383090	G	T	.	.	.	.	.	.
NC_019458.2	3383149	C	T	.	.	.	.	.	.
NC_019458.2	3383152	G	C	.	.	.	.	.	.
NC_019458.2	3383153	G	A	.	.	.	.	.	.
NC_019458.2	3383211	G	T,A	.	.	.	.	.	.
NC_019458.2	3383233	C	T	.	.	.	.	.	.
NC_019458.2	3383234	G	A	.	.	.	.	.	.
NC_019458.2	3383323	C	CG	.	.	.	.	.	.
NC_019458.2	3383334	G	T	.	.	.	.	.	.
NC_019458.2	3383336	G	A	.	.	.	.	.	.
NC_019458.2	3383375	C	A	.	.	.	.	.	.
NC_019458.2	3383454	T	C	.	.	.	.	.	.
NC_019458.2	3383460	T	C	.	.	.	.	.	.
NC_019458.2	3383510	A	G	.	.	.	.	.	.
NC_019458.2	3383520	T	A	.	.	.	.	.	.
NC_019458.2	3383525	A	C	.	.	.	.	.	.
NC_019458.2	3383533	C	T	.	.	.	.	.	.
NC_019458.2	3383593	A	G	.	.	.	.	.	.
NC_019458.2	3383679	T	G	.	.	.	.	.	.
NC_019458.2	3383718	C	T	.	.	.	.	.	.
NC_019458.2	3383732	C	CTT	.	.	.	.	.	.
NC_019458.2	3383740	C	G	.	.	.	.	.	.
NC_019458.2	3383747	G	A	.	.	.	.	.	.
NC_019458.2	3383750	G	A	.	.	.	.	.	.
NC_019458.2	3383753	C	G	.	.	.	.	.	.
NC_019458.2	3383793	T	C	.	.	.	.	.	.
NC_019458.2	3383814	A	G	.	.	.	.	.	.
NC_019458.2	3383844	A	G	.	.	.	.	.	.
NC_019458.2	3383856	G	A	.	.	.	.	.	.
NC_019458.2	3383874	G	C	.	.	.	.	.	.
NC_019458.2	3383892	G	A	.	.	.	.	.	.
NC_019458.2	3383971	C	T	.	.	.	.	.	.
NC_019458.2	3383976	G	A	.	.	.	.	.	.
NC_019458.2	3383980	G	A	.	.	.	.	.	.
NC_019458.2	3384000	G	A	.	.	.	.	.	.
NC_019458.2	3384064	G	T	.	.	.	.	.	.
NC_019458.2	3384072	C	T	.	.	.	.	.	.
NC_019458.2	3384083	CTGGGGAG	C	.	.	.	.	.	.
NC_019458.2	3384091	CCGGGG	C	.	.	.	.	.	.
NC_019458.2	3384097	AGAG	A	.	.	.	.	.	.
NC_019458.2	3384105	G	GC	.	.	.	.	.	.
NC_019458.2	3384106	A	T	.	.	.	.	.	.
NC_019458.2	3384120	C	T	.	.	.	.	.	.
NC_019458.2	3384149	T	C	.	.	.	.	.	.
NC_019458.2	3384168	T	C	.	.	.	.	.	.
NC_019458.2	3384169	G	A	.	.	.	.	.	.
NC_019458.2	3384202	A	C,T	.	.	.	.	.	.
NC_019458.2	3384209	A	G,C	.	.	.	.	.	.
NC_019458.2	3384234	T	C	.	.	.	.	.	.
NC_019458.2	3384246	G	A	.	.	.	.	.	.
NC_019458.2	3384292	G	A	.	.	.	.	.	.
NC_019458.2	3384297	T	C	.	.	.	.	.	.
NC_019458.2	3384311	A	G	.	.	.	.	.	.
NC_019458.2	3384347	T	C	.	.	.	.	.	.
NC_019458.2	3384375	A	G	.	.	.	.	.	.
NC_019458.2	3384385	T	C	.	.	.	.	.	.
NC_019458.2	3384408	A	G	.	.	.	.	.	.
NC_019458.2	3384410	T	C	.	.	.	.	.	.
NC_019458.2	3384419	A	C	.	.	.	.	.	.
NC_019458.2	3384475	A	G	.	.	.	.	.	.
NC_019458.2	3384498	G	A	.	.	.	.	.	.
NC_019458.2	3384540	A	G	.	.	.	.	.	.
NC_019458.2	3384543	C	T	.	.	.	.	.	.
NC_019458.2	3384544	A	G	.	.	.	.	.	.
NC_019458.2	3384557	CTT	C	.	.	.	.	.	.
NC_019458.2	3384566	T	A	.	.	.	.	.	.
NC_019458.2	3384593	T	C	.	.	.	.	.	.
NC_019458.2	3384607	T	C	.	.	.	.	.	.
NC_019458.2	3384608	C	T	.	.	.	.	.	.
NC_019458.2	3384613	A	G	.	.	.	.	.	.
NC_019458.2	3384637	A	G	.	.	.	.	.	.
NC_019458.2	3384664	C	T	.	.	.	.	.	.
NC_019458.2	3384705	A	G	.	.	.	.	.	.
NC_019458.2	3384721	C	G	.	.	.	.	.	.
NC_019458.2	3384789	C	T	.	.	.	.	.	.
NC_019458.2	3384825	A	G	.	.	.	.	.	.
NC_019458.2	3384833	G	GGCCTCTTCTTTGT	.	.	.	.	.	.
NC_019458.2	3384865	CAGAT	C	.	.	.	.	.	.
NC_019458.2	3384873	C	T	.	.	.	.	.	.
NC_019458.2	3384909	C	G	.	.	.	.	.	.
NC_019458.2	3384917	GAC	G	.	.	.	.	.	.
NC_019458.2	3384931	CAGAG	C	.	.	.	.	.	.
NC_019458.2	3384939	T	C	.	.	.	.	.	.
NC_019458.2	3384946	T	C	.	.	.	.	.	.
NC_019458.2	3384956	A	G	.	.	.	.	.	.
NC_019458.2	3384980	C	T	.	.	.	.	.	.
NC_019458.2	3385007	A	G	.	.	.	.	.	.
NC_019458.2	3385036	G	A	.	.	.	.	.	.
NC_019458.2	3385037	C	A	.	.	.	.	.	.
NC_019458.2	3385077	C	T	.	.	.	.	.	.
NC_019458.2	3385261	G	A	.	.	.	.	.	.
NC_019458.2	3385385	A	G	.	.	.	.	.	.
NC_019458.2	3385402	A	G	.	.	.	.	.	.
NC_019458.2	3385497	C	T	.	.	.	.	.	.
NC_019458.2	3385498	G	A	.	.	.	.	.	.
NC_019458.2	3385533	G	A	.	.	.	.	.	.
NC_019458.2	3385559	T	C	.	.	.	.	.	.
NC_019458.2	3385696	C	T	.	.	.	.	.	.
NC_019458.2	3385707	G	A	.	.	.	.	.	.
NC_019458.2	3385726	G	A	.	.	.	.	.	.
NC_019458.2	3385756	C	T	.	.	.	.	.	.
NC_019458.2	3385791	G	A	.	.	.	.	.	.
NC_019458.2	3385832	C	T	.	.	.	.	.	.
NC_019458.2	3385840	G	C	.	.	.	.	.	.
NC_019458.2	3385888	G	T	.	.	.	.	.	.
NC_019458.2	3385914	A	G	.	.	.	.	.	.
NC_019458.2	3385942	C	A	.	.	.	.	.	.
NC_019458.2	3386148	ATT	AT,A	.	.	.	.	.	.
NC_019458.2	3386158	T	C	.	.	.	.	.	.
NC_019458.2	3386176	G	T	.	.	.	.	.	.
NC_019458.2	3386201	G	A	.	.	.	.	.	.
NC_019458.2	3386204	G	GA	.	.	.	.	.	.
NC_019458.2	3386216	A	G	.	.	.	.	.	.
NC_019458.2	3386231	C	T	.	.	.	.	.	.
NC_019458.2	3386265	A	C	.	.	.	.	.	.
NC_019458.2	3386321	CA	C	.	.	.	.	.	.
NC_019458.2	3386383	T	C	.	.	.	.	.	.
NC_019458.2	3386402	C	T	.	.	.	.	.	.
NC_019458.2	3386429	G	A	.	.	.	.	.	.
NC_019458.2	3386457	A	G	.	.	.	.	.	.
NC_019458.2	3386538	A	G	.	.	.	.	.	.
NC_019458.2	3386702	C	T	.	.	.	.	.	.
NC_019458.2	3386738	G	A	.	.	.	.	.	.
NC_019458.2	3386757	G	A	.	.	.	.	.	.
NC_019458.2	3386805	T	C	.	.	.	.	.	.
NC_019458.2	3386818	T	C	.	.	.	.	.	.
NC_019458.2	3387132	G	A	.	.	.	.	.	.
NC_019458.2	3387159	C	G	.	.	.	.	.	.
NC_019458.2	3387268	A	T,C	.	.	.	.	.	.
NC_019458.2	3387343	T	G	.	.	.	.	.	.
NC_019458.2	3387348	C	T	.	.	.	.	.	.
NC_019458.2	3387382	C	A	.	.	.	.	.	.
NC_019458.2	3387472	A	G	.	.	.	.	.	.
NC_019458.2	3387522	G	C	.	.	.	.	.	.
NC_019458.2	3387535	C	T	.	.	.	.	.	.
NC_019458.2	3387616	G	A	.	.	.	.	.	.
NC_019458.2	3387674	C	T	.	.	.	.	.	.
NC_019458.2	3387705	T	C	.	.	.	.	.	.
NC_019458.2	3387733	G	A	.	.	.	.	.	.
NC_019458.2	3387778	T	A	.	.	.	.	.	.
NC_019458.2	3387881	G	A	.	.	.	.	.	.
NC_019458.2	3387895	G	A	.	.	.	.	.	.
NC_019458.2	3387950	G	A	.	.	.	.	.	.
NC_019458.2	3387969	G	A	.	.	.	.	.	.
NC_019458.2	3387998	C	T	.	.	.	.	.	.
NC_019458.2	3388005	G	A	.	.	.	.	.	.
NC_019458.2	3388085	C	T	.	.	.	.	.	.
NC_019458.2	3388207	T	C	.	.	.	.	.	.
NC_019458.2	3388216	C	A	.	.	.	.	.	.
NC_019458.2	3388290	G	A	.	.	.	.	.	.
NC_019458.2	3388361	C	T	.	.	.	.	.	.
NC_019458.2	3388374	A	G	.	.	.	.	.	.
NC_019458.2	3388498	T	C	.	.	.	.	.	.
NC_019458.2	3388531	G	A	.	.	.	.	.	.
NC_019458.2	3388568	T	C	.	.	.	.	.	.
NC_019458.2	3388650	G	T	.	.	.	.	.	.
NC_019458.2	3388693	C	T	.	.	.	.	.	.
NC_019458.2	3388768	CGT	C	.	.	.	.	.	.
NC_019458.2	3388780	C	T	.	.	.	.	.	.
NC_019458.2	3388786	C	T	.	.	.	.	.	.
NC_019458.2	3388802	CTCTGTGTGTATAGGTATG	C	.	.	.	.	.	.
NC_019458.2	3388818	A	G,*	.	.	.	.	.	.
NC_019458.2	3388842	C	G	.	.	.	.	.	.
NC_019458.2	3388855	GGTAT	G	.	.	.	.	.	.
NC_019458.2	3388868	CTG	C	.	.	.	.	.	.
NC_019458.2	3388872	G	C	.	.	.	.	.	.
NC_019458.2	3388876	G	A	.	.	.	.	.	.
NC_019458.2	3388915	C	CTG	.	.	.	.	.	.
NC_019458.2	3388977	A	G	.	.	.	.	.	.
NC_019458.2	3389025	C	G	.	.	.	.	.	.
NC_019458.2	3389060	A	T	.	.	.	.	.	.
NC_019458.2	3389190	GGT	G	.	.	.	.	.	.
NC_019458.2	3389205	G	C	.	.	.	.	.	.
NC_019458.2	3389272	G	A	.	.	.	.	.	.
NC_019458.2	3389282	A	G	.	.	.	.	.	.
NC_019458.2	3389324	G	A	.	.	.	.	.	.
NC_019458.2	3389340	T	C	.	.	.	.	.	.
NC_019458.2	3389367	G	A	.	.	.	.	.	.
NC_019458.2	3389373	A	ATGTG	.	.	.	.	.	.
NC_019458.2	3389387	GTGAACAGGTGTGTGTGCAGGTGTGTGTGTGTAGGAGGTGAGGTGGTGTCTGTGTGAACAGATGTGTGTGTC	G	.	.	.	.	.	.
NC_019458.2	3389543	ATGTGAACAGGTGTGTGTGTCTCTGTGTGTGTGCAGATGTGTGTGTGTGTCTG	A	.	.	.	.	.	.
NC_019458.2	3389578	GAT	G,*	.	.	.	.	.	.
NC_019458.2	3389582	TGTGTGTGTGTCTGTGTGAACAGGTGTGTGTGTCTCTGTGTGTGCAG	T,*	.	.	.	.	.	.
NC_019458.2	3389588	TGTGTCTGTGTGAACAGGTGTGTGTGTCTCTGTGTGTGCAGGTGTGTGTGTAGGAGGTAAGATG	T,*	.	.	.	.	.	.
NC_019458.2	3389592	TCTGTG	T,*	.	.	.	.	.	.
NC_019458.2	3389600	AAC	A,*	.	.	.	.	.	.
NC_019458.2	3389609	GT	G,*	.	.	.	.	.	.
NC_019458.2	3389615	CTCTG	C,*	.	.	.	.	.	.
NC_019458.2	3389632	TGTGTGTAGGAGGTAAGATG	T,*	.	.	.	.	.	.
NC_019458.2	3389756	G	GAT	.	.	.	.	.	.
NC_019458.2	3389757	G	A	.	.	.	.	.	.
NC_019458.2	3389765	G	GTGTGTGTGTGAACAGGTGTGTGTGTC	.	.	.	.	.	.
NC_019458.2	3389767	C	G	.	.	.	.	.	.
NC_019458.2	3389808	CTGTGTACAGGTGTGTCTTGTGTGTGTCTGTGTGTGTGTCTGTGTCTGTGTGTGTCTGTGTCTGTGTGTGTGTGTTTGTGTTTTTGTGTGTGTGTGTCTGTGTGGGTGGGTTTGTGTGTGGGTGTGTGTGGGGGGTGTGTGGGTGTGTGTGTGTGGGGGGTGTGGGGGTGTGTG	C	.	.	.	.	.	.
NC_019458.2	3390011	GTGTGTGTCTCCCTGTGTGCACAGGTGTGTGTGTAGGAGGTGAGGTGGTGTCTGTGTGAACAGA	G	.	.	.	.	.	.
NC_019458.2	3390369	G	T	.	.	.	.	.	.
NC_019458.2	3390383	T	C	.	.	.	.	.	.
NC_019458.2	3390399	G	GTGGCGGTGGGCTCA	.	.	.	.	.	.
NC_019458.2	3390433	T	C	.	.	.	.	.	.
NC_019458.2	3390516	T	C	.	.	.	.	.	.
NC_019458.2	3390517	G	A	.	.	.	.	.	.
NC_019458.2	3390559	A	G	.	.	.	.	.	.
NC_019458.2	3390563	G	C	.	.	.	.	.	.
NC_019458.2	3390577	TG	T	.	.	.	.	.	.
NC_019458.2	3390612	G	A	.	.	.	.	.	.
NC_019458.2	3390620	G	A	.	.	.	.	.	.
NC_019458.2	3390677	C	T	.	.	.	.	.	.
NC_019458.2	3390751	C	T	.	.	.	.	.	.
NC_019458.2	3390778	C	T	.	.	.	.	.	.
NC_019458.2	3390785	G	T	.	.	.	.	.	.
NC_019458.2	3390820	T	C	.	.	.	.	.	.
NC_019458.2	3390828	C	T	.	.	.	.	.	.
NC_019458.2	3390843	A	G	.	.	.	.	.	.
NC_019458.2	3390882	G	T	.	.	.	.	.	.
NC_019458.2	3390901	G	A	.	.	.	.	.	.
NC_019458.2	3390905	G	A	.	.	.	.	.	.
NC_019458.2	3390918	G	A	.	.	.	.	.	.
NC_019458.2	3390922	G	GCA	.	.	.	.	.	.
NC_019458.2	3390970	C	T	.	.	.	.	.	.
NC_019458.2	3390971	C	G	.	.	.	.	.	.
NC_019458.2	3390995	T	C	.	.	.	.	.	.
NC_019458.2	3391013	C	T	.	.	.	.	.	.
NC_019458.2	3391040	G	A	.	.	.	.	.	.
NC_019458.2	3391163	G	A	.	.	.	.	.	.
NC_019458.2	3391233	T	C	.	.	.	.	.	.
NC_019458.2	3391243	T	C	.	.	.	.	.	.
NC_019458.2	3391249	G	T	.	.	.	.	.	.
NC_019458.2	3391265	C	A	.	.	.	.	.	.
NC_019458.2	3391323	G	A	.	.	.	.	.	.
NC_019458.2	3391474	G	A	.	.	.	.	.	.
NC_019458.2	3391508	G	A	.	.	.	.	.	.
NC_019458.2	3391595	G	A	.	.	.	.	.	.
NC_019458.2	3391623	C	A	.	.	.	.	.	.
NC_019458.2	3391652	T	C	.	.	.	.	.	.
NC_019458.2	3391690	G	A	.	.	.	.	.	.
NC_019458.2	3391729	A	G	.	.	.	.	.	.
NC_019458.2	3391743	A	C	.	.	.	.	.	.
NC_019458.2	3391903	C	T	.	.	.	.	.	.
NC_019458.2	3391934	T	C	.	.	.	.	.	.
NC_019458.2	3391951	C	T	.	.	.	.	.	.
NC_019458.2	3391965	T	C	.	.	.	.	.	.
NC_019458.2	3392041	CAG	C	.	.	.	.	.	.
NC_019458.2	3392043	G	A,*	.	.	.	.	.	.
NC_019458.2	3392053	C	T	.	.	.	.	.	.
NC_019458.2	3392153	C	T	.	.	.	.	.	.
NC_019458.2	3392354	G	A	.	.	.	.	.	.
NC_019458.2	3392388	A	G	.	.	.	.	.	.
NC_019458.2	3392392	G	T	.	.	.	.	.	.
NC_019458.2	3392472	G	A	.	.	.	.	.	.
NC_019458.2	3392481	A	G	.	.	.	.	.	.
NC_019458.2	3392499	T	C	.	.	.	.	.	.
NC_019458.2	3392504	A	G	.	.	.	.	.	.
NC_019458.2	3392612	G	A	.	.	.	.	.	.
NC_019458.2	3392621	C	T	.	.	.	.	.	.
NC_019458.2	3392661	T	C	.	.	.	.	.	.
NC_019458.2	3392719	A	AT	.	.	.	.	.	.
NC_019458.2	3392789	AAC	A	.	.	.	.	.	.
NC_019458.2	3392796	T	C	.	.	.	.	.	.
NC_019458.2	3392807	G	C	.	.	.	.	.	.
NC_019458.2	3392855	C	A	.	.	.	.	.	.
NC_019458.2	3392861	C	T	.	.	.	.	.	.
NC_019458.2	3392884	C	T	.	.	.	.	.	.
NC_019458.2	3392885	C	G	.	.	.	.	.	.
NC_019458.2	3392897	T	C	.	.	.	.	.	.
NC_019458.2	3392898	G	C	.	.	.	.	.	.
NC_019458.2	3392928	C	A	.	.	.	.	.	.
NC_019458.2	3392939	G	A	.	.	.	.	.	.
NC_019458.2	3392972	T	C	.	.	.	.	.	.
NC_019458.2	3393003	G	T	.	.	.	.	.	.
NC_019458.2	3393005	C	T	.	.	.	.	.	.
NC_019458.2	3393006	G	A	.	.	.	.	.	.
NC_019458.2	3393049	C	T	.	.	.	.	.	.
NC_019458.2	3393128	A	C	.	.	.	.	.	.
NC_019458.2	3393154	C	T	.	.	.	.	.	.
NC_019458.2	3393196	T	A	.	.	.	.	.	.
NC_019458.2	3393246	G	A	.	.	.	.	.	.
NC_019458.2	3393252	G	T	.	.	.	.	.	.
NC_019458.2	3393297	C	T	.	.	.	.	.	.
NC_019458.2	3393303	C	T	.	.	.	.	.	.
NC_019458.2	3393328	C	T	.	.	.	.	.	.
NC_019458.2	3393367	G	A	.	.	.	.	.	.
NC_019458.2	3393404	G	T	.	.	.	.	.	.
NC_019458.2	3393405	C	A	.	.	.	.	.	.
NC_019458.2	3393474	C	T	.	.	.	.	.	.
NC_019458.2	3393616	A	G	.	.	.	.	.	.
NC_019458.2	3393633	T	C	.	.	.	.	.	.
NC_019458.2	3393671	C	G	.	.	.	.	.	.
NC_019458.2	3393677	T	C	.	.	.	.	.	.
NC_019458.2	3393678	G	A	.	.	.	.	.	.
NC_019458.2	3393715	CT	C	.	.	.	.	.	.
NC_019458.2	3393735	CTG	C	.	.	.	.	.	.
NC_019458.2	3393736	T	C,*	.	.	.	.	.	.
NC_019458.2	3393737	GC	G,*	.	.	.	.	.	.
NC_019458.2	3393754	G	A	.	.	.	.	.	.
NC_019458.2	3393779	A	G	.	.	.	.	.	.
NC_019458.2	3393796	G	C	.	.	.	.	.	.
NC_019458.2	3393821	A	G	.	.	.	.	.	.
NC_019458.2	3393826	A	C	.	.	.	.	.	.
NC_019458.2	3393846	G	A	.	.	.	.	.	.
NC_019458.2	3393871	C	T	.	.	.	.	.	.
NC_019458.2	3393908	A	G	.	.	.	.	.	.
NC_019458.2	3393957	G	A	.	.	.	.	.	.
NC_019458.2	3394042	A	G	.	.	.	.	.	.
NC_019458.2	3394081	C	T	.	.	.	.	.	.
NC_019458.2	3394084	T	C	.	.	.	.	.	.
NC_019458.2	3394093	A	C	.	.	.	.	.	.
NC_019458.2	3394103	T	C	.	.	.	.	.	.
NC_019458.2	3394121	G	A	.	.	.	.	.	.
NC_019458.2	3394135	TGGGGTG	T	.	.	.	.	.	.
NC_019458.2	3394169	G	C	.	.	.	.	.	.
NC_019458.2	3394220	G	A	.	.	.	.	.	.
NC_019458.2	3394237	A	G	.	.	.	.	.	.
NC_019458.2	3394488	G	GGAGAGAA	.	.	.	.	.	.
NC_019458.2	3394493	G	GAAGAGAGCAAGGAGGGCCAGAGGCGGCAGAGAGACGCTCCGCTGACCCTGAGCGAGAGGCCCTCGCAGCGTGGCCGATGCTGTGCCCACTAGAAGCGGCCGCTC	.	.	.	.	.	.
NC_019458.2	3394494	C	CAAGG	.	.	.	.	.	.
NC_019458.2	3394496	G	GAGAGCAAGGA	.	.	.	.	.	.
NC_019458.2	3394498	G	GGCAGCTGCGGGGAAGCGGGTACTCCCAGCCCGCGCCCCGGCGGTCCTCTGAGCGAGCTCCA,GCCGGAGGCGGCAGAGAGACGCTCCGCTGACCCTGAGCGAGAGGCCCTCGCAGCGTGGCCGATGCTGTGCCCACTAGAAGCGGCCACTCCGGGGGCAGCTGCGGGGAAGCGGGTACTCCCAGCCCGTGCCCCGGCGGTCCTCTGAGCGAGCTCCA,GCCAGAGGCGGCAGAGAGACGCTCCGCTGACCCTGAGCGAGCGGCCCTCGCAGCGTGGCCGATGCTGTGCCCACTAGAAGCGGCCGCTCCGGGGGCAGCTGCGGGGAAGCGGGTACTCCCAGCCCGCGCCCCGGCGGTCCTCTGAGCGAGCTCCA	.	.	.	.	.	.
NC_019458.2	3394516	G	A	.	.	.	.	.	.
NC_019458.2	3394530	C	T	.	.	.	.	.	.
NC_019458.2	3394535	A	C	.	.	.	.	.	.
NC_019458.2	3394551	A	G	.	.	.	.	.	.
NC_019458.2	3394575	G	A	.	.	.	.	.	.
NC_019458.2	3394581	A	C	.	.	.	.	.	.
NC_019458.2	3394672	A	T	.	.	.	.	.	.
NC_019458.2	3394700	C	T	.	.	.	.	.	.
NC_019458.2	3394711	G	T,A	.	.	.	.	.	.
NC_019458.2	3394749	A	G	.	.	.	.	.	.
NC_019458.2	3394750	G	GT	.	.	.	.	.	.
NC_019458.2	3394751	C	T	.	.	.	.	.	.
NC_019458.2	3394774	C	G	.	.	.	.	.	.
NC_019458.2	3394803	T	C	.	.	.	.	.	.
NC_019458.2	3394859	C	A	.	.	.	.	.	.
NC_019458.2	3394931	A	G	.	.	.	.	.	.
NC_019458.2	3394939	G	A	.	.	.	.	.	.
NC_019458.2	3394952	C	T	.	.	.	.	.	.
NC_019458.2	3395049	A	C	.	.	.	.	.	.
NC_019458.2	3395063	C	T	.	.	.	.	.	.
NC_019458.2	3395136	G	C	.	.	.	.	.	.
NC_019458.2	3395150	G	A	.	.	.	.	.	.
NC_019458.2	3395172	T	C	.	.	.	.	.	.
NC_019458.2	3395184	C	T	.	.	.	.	.	.
NC_019458.2	3395188	G	A	.	.	.	.	.	.
NC_019458.2	3395189	C	T	.	.	.	.	.	.
NC_019458.2	3395217	A	G	.	.	.	.	.	.
NC_019458.2	3395268	G	A	.	.	.	.	.	.
NC_019458.2	3395285	T	A	.	.	.	.	.	.
NC_019458.2	3395286	CTGGGA	C	.	.	.	.	.	.
NC_019458.2	3395320	TAAG	T	.	.	.	.	.	.
NC_019458.2	3395336	TCCCC	TCCCCC,TCCC,T	.	.	.	.	.	.
NC_019458.2	3395346	CCCAA	C	.	.	.	.	.	.
NC_019458.2	3395347	CCA	C,*	.	.	.	.	.	.
NC_019458.2	3395395	C	T	.	.	.	.	.	.
NC_019458.2	3395398	A	T	.	.	.	.	.	.
NC_019458.2	3395462	A	G	.	.	.	.	.	.
NC_019458.2	3395485	C	T	.	.	.	.	.	.
NC_019458.2	3395540	C	T	.	.	.	.	.	.
NC_019458.2	3395568	A	C	.	.	.	.	.	.
NC_019458.2	3395655	C	T	.	.	.	.	.	.
NC_019458.2	3395713	G	A	.	.	.	.	.	.
NC_019458.2	3395758	C	T	.	.	.	.	.	.
NC_019458.2	3395848	T	C,G	.	.	.	.	.	.
NC_019458.2	3395862	C	T	.	.	.	.	.	.
NC_019458.2	3395885	G	A	.	.	.	.	.	.
NC_019458.2	3395944	G	A	.	.	.	.	.	.
NC_019458.2	3396016	T	C	.	.	.	.	.	.
NC_019458.2	3396042	A	G	.	.	.	.	.	.
NC_019458.2	3396061	G	A	.	.	.	.	.	.
NC_019458.2	3396072	G	A	.	.	.	.	.	.
NC_019458.2	3396073	T	C	.	.	.	.	.	.
NC_019458.2	3396097	G	A	.	.	.	.	.	.
NC_019458.2	3396120	G	T	.	.	.	.	.	.
NC_019458.2	3396121	G	A	.	.	.	.	.	.
NC_019458.2	3396145	A	T	.	.	.	.	.	.
NC_019458.2	3396152	T	C	.	.	.	.	.	.
NC_019458.2	3396157	G	A	.	.	.	.	.	.
NC_019458.2	3396182	G	A	.	.	.	.	.	.
NC_019458.2	3396199	C	T	.	.	.	.	.	.
NC_019458.2	3396218	C	T	.	.	.	.	.	.
NC_019458.2	3396248	T	C	.	.	.	.	.	.
NC_019458.2	3396260	G	T	.	.	.	.	.	.
NC_019458.2	3396263	T	G	.	.	.	.	.	.
NC_019458.2	3396273	G	T	.	.	.	.	.	.
NC_019458.2	3396399	G	A	.	.	.	.	.	.
NC_019458.2	3396416	G	A	.	.	.	.	.	.
NC_019458.2	3396443	C	G	.	.	.	.	.	.
NC_019458.2	3396481	C	T	.	.	.	.	.	.
NC_019458.2	3396526	T	C	.	.	.	.	.	.
NC_019458.2	3396578	T	C	.	.	.	.	.	.
NC_019458.2	3396607	CTG	C	.	.	.	.	.	.
NC_019458.2	3396619	T	C	.	.	.	.	.	.
NC_019458.2	3396620	G	A	.	.	.	.	.	.
NC_019458.2	3396712	G	GC	.	.	.	.	.	.
NC_019458.2	3396721	C	A	.	.	.	.	.	.
NC_019458.2	3396816	TGTGTGTGTGTGCACACGCGC	T	.	.	.	.	.	.
NC_019458.2	3396818	TGTGTGTGTGCACACGCGC	T,*	.	.	.	.	.	.
NC_019458.2	3396858	G	A	.	.	.	.	.	.
NC_019458.2	3396880	G	A	.	.	.	.	.	.
NC_019458.2	3396936	C	T	.	.	.	.	.	.
NC_019458.2	3396944	T	C	.	.	.	.	.	.
NC_019458.2	3396958	CCTT	C	.	.	.	.	.	.
NC_019458.2	3397034	T	C	.	.	.	.	.	.
NC_019458.2	3397184	C	T	.	.	.	.	.	.
NC_019458.2	3397188	C	T	.	.	.	.	.	.
NC_019458.2	3397225	C	CG	.	.	.	.	.	.
NC_019458.2	3397266	A	G	.	.	.	.	.	.
NC_019458.2	3397271	T	G	.	.	.	.	.	.
NC_019458.2	3397294	G	T	.	.	.	.	.	.
NC_019458.2	3397300	C	T	.	.	.	.	.	.
NC_019458.2	3397370	G	A	.	.	.	.	.	.
NC_019458.2	3397422	G	A	.	.	.	.	.	.
NC_019458.2	3397436	G	A	.	.	.	.	.	.
NC_019458.2	3397447	C	A	.	.	.	.	.	.
NC_019458.2	3397453	C	T	.	.	.	.	.	.
NC_019458.2	3397456	C	T	.	.	.	.	.	.
NC_019458.2	3397524	TGGG	T	.	.	.	.	.	.
NC_019458.2	3397536	G	C	.	.	.	.	.	.
NC_019458.2	3397539	T	C	.	.	.	.	.	.
NC_019458.2	3397573	A	G	.	.	.	.	.	.
NC_019458.2	3397593	G	A	.	.	.	.	.	.
NC_019458.2	3397596	G	A	.	.	.	.	.	.
NC_019458.2	3397674	C	T	.	.	.	.	.	.
NC_019458.2	3397678	CAAAAAAA	CAAAAAAAAA,C	.	.	.	.	.	.
NC_019458.2	3397701	C	T	.	.	.	.	.	.
NC_019458.2	3397864	G	T	.	.	.	.	.	.
NC_019458.2	3397875	A	G	.	.	.	.	.	.
NC_019458.2	3397919	G	A	.	.	.	.	.	.
NC_019458.2	3397946	G	A	.	.	.	.	.	.
NC_019458.2	3398009	T	A	.	.	.	.	.	.
NC_019458.2	3398026	C	T	.	.	.	.	.	.
NC_019458.2	3398046	TCTC	T	.	.	.	.	.	.
NC_019458.2	3398057	G	T	.	.	.	.	.	.
NC_019458.2	3398106	T	C	.	.	.	.	.	.
NC_019458.2	3398174	TCGTCTTTACTTTA	T	.	.	.	.	.	.
NC_019458.2	3398177	TCTTTA	T,*	.	.	.	.	.	.
NC_019458.2	3398373	C	T	.	.	.	.	.	.
NC_019458.2	3398415	T	C	.	.	.	.	.	.
NC_019458.2	3398517	C	T	.	.	.	.	.	.
NC_019458.2	3398539	GC	G	.	.	.	.	.	.
NC_019458.2	3398541	A	AGAAGGTAAAGG,AGAAGGGAAAGG	.	.	.	.	.	.
NC_019458.2	3398543	T	C	.	.	.	.	.	.
NC_019458.2	3398546	A	G	.	.	.	.	.	.
NC_019458.2	3398549	C	A	.	.	.	.	.	.
NC_019458.2	3398550	C	T	.	.	.	.	.	.
NC_019458.2	3398554	T	G	.	.	.	.	.	.
NC_019458.2	3398562	A	G	.	.	.	.	.	.
NC_019458.2	3398566	C	A	.	.	.	.	.	.
NC_019458.2	3398569	A	G	.	.	.	.	.	.
NC_019458.2	3398572	GAC	G	.	.	.	.	.	.
NC_019458.2	3398578	GGA	G,*	.	.	.	.	.	.
NC_019458.2	3398592	TACA	T	.	.	.	.	.	.
NC_019458.2	3398594	C	T,*	.	.	.	.	.	.
NC_019458.2	3398598	C	CG	.	.	.	.	.	.
NC_019458.2	3398681	C	T	.	.	.	.	.	.
NC_019458.2	3398725	G	T	.	.	.	.	.	.
NC_019458.2	3398761	C	T	.	.	.	.	.	.
NC_019458.2	3398794	G	GC	.	.	.	.	.	.
NC_019458.2	3398795	CAA	CAAAA,CA,C	.	.	.	.	.	.
NC_019458.2	3398796	A	C,*	.	.	.	.	.	.
NC_019458.2	3398798	A	C	.	.	.	.	.	.
NC_019458.2	3398815	A	T	.	.	.	.	.	.
NC_019458.2	3398842	C	T	.	.	.	.	.	.
NC_019458.2	3398937	G	A	.	.	.	.	.	.
NC_019458.2	3398956	T	G	.	.	.	.	.	.
NC_019458.2	3398998	C	T	.	.	.	.	.	.
NC_019458.2	3399001	T	A	.	.	.	.	.	.
NC_019458.2	3399021	G	A	.	.	.	.	.	.
NC_019458.2	3399035	T	C	.	.	.	.	.	.
NC_019458.2	3399065	G	A	.	.	.	.	.	.
NC_019458.2	3399155	C	T	.	.	.	.	.	.
NC_019458.2	3399199	C	T	.	.	.	.	.	.
NC_019458.2	3399224	C	T	.	.	.	.	.	.
NC_019458.2	3399226	C	A	.	.	.	.	.	.
NC_019458.2	3399270	T	C	.	.	.	.	.	.
NC_019458.2	3399285	C	T	.	.	.	.	.	.
NC_019458.2	3399301	G	A	.	.	.	.	.	.
NC_019458.2	3399355	T	C	.	.	.	.	.	.
NC_019458.2	3399407	T	A	.	.	.	.	.	.
NC_019458.2	3399591	TG	T	.	.	.	.	.	.
NC_019458.2	3399593	G	GCC	.	.	.	.	.	.
NC_019458.2	3399594	G	GCACT	.	.	.	.	.	.
NC_019458.2	3399595	G	C	.	.	.	.	.	.
NC_019458.2	3399597	G	GCACTCCT	.	.	.	.	.	.
NC_019458.2	3399611	T	C	.	.	.	.	.	.
NC_019458.2	3399635	C	T	.	.	.	.	.	.
NC_019458.2	3399694	T	G	.	.	.	.	.	.
NC_019458.2	3399728	C	T	.	.	.	.	.	.
NC_019458.2	3399783	AGCAGAGAGTCGGACATGACTGAGCGACCGAACCACACAACGATACAAGCCCAGCACCCGCCCTCCTCCGGCTGGCCAGTGAGCGTGGACCCCCG	A	.	.	.	.	.	.
NC_019458.2	3399988	G	A	.	.	.	.	.	.
NC_019458.2	3400015	G	A	.	.	.	.	.	.
NC_019458.2	3400109	G	A	.	.	.	.	.	.
NC_019458.2	3400215	C	T	.	.	.	.	.	.
NC_019458.2	3400216	A	G	.	.	.	.	.	.
NC_019458.2	3400223	A	G	.	.	.	.	.	.
NC_019458.2	3400326	C	T	.	.	.	.	.	.
NC_019458.2	3400375	G	A	.	.	.	.	.	.
NC_019458.2	3400453	G	A	.	.	.	.	.	.
NC_019458.2	3400509	G	A	.	.	.	.	.	.
NC_019458.2	3400523	C	T	.	.	.	.	.	.
NC_019458.2	3400524	G	A	.	.	.	.	.	.
NC_019458.2	3400530	G	T	.	.	.	.	.	.
NC_019458.2	3400560	A	G	.	.	.	.	.	.
NC_019458.2	3400564	C	T	.	.	.	.	.	.
NC_019458.2	3400608	T	C	.	.	.	.	.	.
NC_019458.2	3400629	C	T	.	.	.	.	.	.
NC_019458.2	3400630	G	A	.	.	.	.	.	.
NC_019458.2	3400631	GC	G	.	.	.	.	.	.
NC_019458.2	3400714	G	C	.	.	.	.	.	.
NC_019458.2	3401022	T	C	.	.	.	.	.	.
NC_019458.2	3401029	T	C	.	.	.	.	.	.
NC_019458.2	3401042	A	G	.	.	.	.	.	.
NC_019458.2	3401044	T	C	.	.	.	.	.	.
NC_019458.2	3401250	GCC	G	.	.	.	.	.	.
NC_019458.2	3401324	G	A	.	.	.	.	.	.
NC_019458.2	3401347	C	T	.	.	.	.	.	.
NC_019458.2	3401542	C	A	.	.	.	.	.	.
NC_019458.2	3401550	G	A	.	.	.	.	.	.
NC_019458.2	3401561	G	A	.	.	.	.	.	.
NC_019458.2	3401573	C	A	.	.	.	.	.	.
NC_019458.2	3401575	C	G	.	.	.	.	.	.
NC_019458.2	3401617	C	T	.	.	.	.	.	.
NC_019458.2	3401622	A	G	.	.	.	.	.	.
NC_019458.2	3401632	C	G	.	.	.	.	.	.
NC_019458.2	3401637	C	T	.	.	.	.	.	.
NC_019458.2	3401668	A	C	.	.	.	.	.	.
NC_019458.2	3401688	T	G	.	.	.	.	.	.
NC_019458.2	3401691	G	A	.	.	.	.	.	.
NC_019458.2	3401714	C	T	.	.	.	.	.	.
NC_019458.2	3401727	A	G	.	.	.	.	.	.
NC_019458.2	3401772	A	G	.	.	.	.	.	.
NC_019458.2	3401836	C	G	.	.	.	.	.	.
NC_019458.2	3401851	C	A	.	.	.	.	.	.
NC_019458.2	3401855	C	G	.	.	.	.	.	.
NC_019458.2	3401860	C	T	.	.	.	.	.	.
NC_019458.2	3401865	C	A	.	.	.	.	.	.
NC_019458.2	3401870	C	CCTCGCTCCCCCCGGG,CCTCGCTCCCCCGGG	.	.	.	.	.	.
NC_019458.2	3402068	G	A	.	.	.	.	.	.
NC_019458.2	3402088	A	ACTGTGGGTG,ACTGTGGGT	.	.	.	.	.	.
NC_019458.2	3402089	GGAACACA	G	.	.	.	.	.	.
NC_019458.2	3402091	A	C,T	.	.	.	.	.	.
NC_019458.2	3402095	CAGGCAGA	CTTGGCCTCGGCGGGGTGGCGGGGGGGAGGCAGA,C	.	.	.	.	.	.
NC_019458.2	3402102	A	ACTT,ATT	.	.	.	.	.	.
NC_019458.2	3402104	GCCT	G	.	.	.	.	.	.
NC_019458.2	3402109	G	GGCGGGGTGGC	.	.	.	.	.	.
NC_019458.2	3402110	A	AGCAGGTTGGT	.	.	.	.	.	.
NC_019458.2	3402111	G	GCA	.	.	.	.	.	.
NC_019458.2	3402116	G	C	.	.	.	.	.	.
NC_019458.2	3402118	T	TGCCAG	.	.	.	.	.	.
NC_019458.2	3402119	GA	G	.	.	.	.	.	.
NC_019458.2	3402121	GTCA	G	.	.	.	.	.	.
NC_019458.2	3402122	TCA	TA,*	.	.	.	.	.	.
NC_019458.2	3402146	C	CTGCTGGGTGGAGGGGG	.	.	.	.	.	.
NC_019458.2	3402151	CTT	C	.	.	.	.	.	.
NC_019458.2	3402155	ACCC	A	.	.	.	.	.	.
NC_019458.2	3402159	TGAC	T	.	.	.	.	.	.
NC_019458.2	3402162	CCAG	C	.	.	.	.	.	.
NC_019458.2	3402167	C	CGGGGGCGGGGG	.	.	.	.	.	.
NC_019458.2	3402170	T	TGGGGGG	.	.	.	.	.	.
NC_019458.2	3402173	G	GC	.	.	.	.	.	.
NC_019458.2	3402174	T	TGAG	.	.	.	.	.	.
NC_019458.2	3402177	T	TGGA	.	.	.	.	.	.
NC_019458.2	3402188	G	GGCAGGGGACCC	.	.	.	.	.	.
NC_019458.2	3402221	G	A	.	.	.	.	.	.
NC_019458.2	3402252	A	G	.	.	.	.	.	.
NC_019458.2	3402253	G	T	.	.	.	.	.	.
NC_019458.2	3402254	C	T	.	.	.	.	.	.
NC_019458.2	3402292	T	C	.	.	.	.	.	.
NC_019458.2	3402352	C	T	.	.	.	.	.	.
NC_019458.2	3402383	C	T	.	.	.	.	.	.
NC_019458.2	3402447	C	T	.	.	.	.	.	.
NC_019458.2	3402458	A	G	.	.	.	.	.	.
NC_019458.2	3402474	C	G	.	.	.	.	.	.
NC_019458.2	3402492	T	C	.	.	.	.	.	.
NC_019458.2	3402575	C	T	.	.	.	.	.	.
NC_019458.2	3402705	A	G	.	.	.	.	.	.
NC_019458.2	3402711	C	T	.	.	.	.	.	.
NC_019458.2	3402842	C	G	.	.	.	.	.	.
NC_019458.2	3402893	G	C	.	.	.	.	.	.
NC_019458.2	3402915	G	A	.	.	.	.	.	.
NC_019458.2	3402953	CT	C	.	.	.	.	.	.
NC_019458.2	3402956	TTTTGGAGACCG	T	.	.	.	.	.	.
NC_019458.2	3402984	TG	T	.	.	.	.	.	.
NC_019458.2	3402992	G	T	.	.	.	.	.	.
NC_019458.2	3403014	T	A	.	.	.	.	.	.
NC_019458.2	3403052	T	C	.	.	.	.	.	.
NC_019458.2	3403116	T	A	.	.	.	.	.	.
NC_019458.2	3403118	C	A	.	.	.	.	.	.
NC_019458.2	3403427	A	G	.	.	.	.	.	.
NC_019458.2	3403465	C	T	.	.	.	.	.	.
NC_019458.2	3403484	T	C	.	.	.	.	.	.
NC_019458.2	3403495	T	A	.	.	.	.	.	.
NC_019458.2	3403527	G	GGAA	.	.	.	.	.	.
NC_019458.2	3403529	C	CAGCT	.	.	.	.	.	.
NC_019458.2	3403531	AC	A	.	.	.	.	.	.
NC_019458.2	3403534	C	G	.	.	.	.	.	.
NC_019458.2	3403535	GCC	G	.	.	.	.	.	.
NC_019458.2	3403536	C	G,*	.	.	.	.	.	.
NC_019458.2	3403537	C	A,*	.	.	.	.	.	.
NC_019458.2	3403538	C	A	.	.	.	.	.	.
NC_019458.2	3403543	C	T	.	.	.	.	.	.
NC_019458.2	3403547	C	T	.	.	.	.	.	.
NC_019458.2	3403569	A	C	.	.	.	.	.	.
NC_019458.2	3403573	A	G	.	.	.	.	.	.
NC_019458.2	3403590	A	G	.	.	.	.	.	.
NC_019458.2	3403613	AT	A	.	.	.	.	.	.
NC_019458.2	3403889	T	C	.	.	.	.	.	.
NC_019458.2	3403890	T	C	.	.	.	.	.	.
NC_019458.2	3403895	G	A	.	.	.	.	.	.
NC_019458.2	3404035	T	A	.	.	.	.	.	.
NC_019458.2	3404046	G	A	.	.	.	.	.	.
NC_019458.2	3404128	T	G	.	.	.	.	.	.
NC_019458.2	3404166	A	C	.	.	.	.	.	.
NC_019458.2	3404170	A	G	.	.	.	.	.	.
NC_019458.2	3404188	G	A	.	.	.	.	.	.
NC_019458.2	3404200	A	G	.	.	.	.	.	.
NC_019458.2	3404223	G	A	.	.	.	.	.	.
NC_019458.2	3404230	A	T	.	.	.	.	.	.
NC_019458.2	3404370	A	G	.	.	.	.	.	.
NC_019458.2	3404404	G	A	.	.	.	.	.	.
NC_019458.2	3404452	A	G	.	.	.	.	.	.
NC_019458.2	3404495	G	A	.	.	.	.	.	.
NC_019458.2	3404594	C	T	.	.	.	.	.	.
NC_019458.2	3404603	T	C	.	.	.	.	.	.
NC_019458.2	3404607	A	G	.	.	.	.	.	.
NC_019458.2	3404848	G	A	.	.	.	.	.	.
NC_019458.2	3404914	A	G	.	.	.	.	.	.
NC_019458.2	3404940	A	G	.	.	.	.	.	.
NC_019458.2	3405026	C	T	.	.	.	.	.	.
NC_019458.2	3405027	G	A	.	.	.	.	.	.
NC_019458.2	3405046	G	A	.	.	.	.	.	.
NC_019458.2	3405056	T	C	.	.	.	.	.	.
NC_019458.2	3405198	T	C	.	.	.	.	.	.
NC_019458.2	3405202	T	C	.	.	.	.	.	.
NC_019458.2	3405203	G	A	.	.	.	.	.	.
NC_019458.2	3405207	T	G	.	.	.	.	.	.
NC_019458.2	3405338	G	A	.	.	.	.	.	.
NC_019458.2	3405342	G	A	.	.	.	.	.	.
NC_019458.2	3405343	C	T	.	.	.	.	.	.
NC_019458.2	3405627	A	G	.	.	.	.	.	.
NC_019458.2	3405630	C	G	.	.	.	.	.	.
NC_019458.2	3405642	A	G	.	.	.	.	.	.
NC_019458.2	3405655	G	A	.	.	.	.	.	.
NC_019458.2	3405727	C	T	.	.	.	.	.	.
NC_019458.2	3406553	C	A	.	.	.	.	.	.
NC_019458.2	3406570	T	C	.	.	.	.	.	.
NC_019458.2	3406754	G	A	.	.	.	.	.	.
NC_019458.2	3406925	T	C	.	.	.	.	.	.
NC_019458.2	3407002	GGA	G	.	.	.	.	.	.
NC_019458.2	3407011	G	C	.	.	.	.	.	.
NC_019458.2	3407083	A	G	.	.	.	.	.	.
NC_019458.2	3407364	G	A	.	.	.	.	.	.
NC_019458.2	3407412	G	A	.	.	.	.	.	.
NC_019458.2	3407420	TGCACCTCGA	T	.	.	.	.	.	.
NC_019458.2	3407442	T	C	.	.	.	.	.	.
NC_019458.2	3407443	A	G	.	.	.	.	.	.
NC_019458.2	3407479	A	G	.	.	.	.	.	.
NC_019458.2	3407558	T	C	.	.	.	.	.	.
NC_019458.2	3407624	T	G	.	.	.	.	.	.
NC_019458.2	3407834	T	A	.	.	.	.	.	.
NC_019458.2	3407842	C	T	.	.	.	.	.	.
NC_019458.2	3407925	A	G	.	.	.	.	.	.
NC_019458.2	3408190	G	A	.	.	.	.	.	.
NC_019458.2	3408230	G	A	.	.	.	.	.	.
NC_019458.2	3408234	C	T	.	.	.	.	.	.
NC_019458.2	3408240	A	G	.	.	.	.	.	.
NC_019458.2	3408248	G	A	.	.	.	.	.	.
NC_019458.2	3408260	G	A	.	.	.	.	.	.
NC_019458.2	3408351	T	C	.	.	.	.	.	.
NC_019458.2	3408382	A	T	.	.	.	.	.	.
NC_019458.2	3408426	C	CA	.	.	.	.	.	.
NC_019458.2	3408434	C	CAGGCAGCAGCCAG	.	.	.	.	.	.
NC_019458.2	3408435	T	TGGTCCC	.	.	.	.	.	.
NC_019458.2	3408503	G	C	.	.	.	.	.	.
NC_019458.2	3408522	A	G	.	.	.	.	.	.
NC_019458.2	3408557	A	G	.	.	.	.	.	.
NC_019458.2	3408617	A	G	.	.	.	.	.	.
NC_019458.2	3408755	C	T	.	.	.	.	.	.
NC_019458.2	3408767	C	A	.	.	.	.	.	.
NC_019458.2	3408875	T	G	.	.	.	.	.	.
NC_019458.2	3408881	T	C	.	.	.	.	.	.
NC_019458.2	3408889	G	T	.	.	.	.	.	.
NC_019458.2	3408894	ATTAAAAGTGGTCCACAGCAAAAATAAACCAGAAAGAAAAATCCCGGGTCAGCGACACAGCTGCGGATGGAGTCGGGGGGG	A	.	.	.	.	.	.
NC_019458.2	3408981	CCGGGGGGG	C	.	.	.	.	.	.
NC_019458.2	3408985	GGGGGC	G,*	.	.	.	.	.	.
NC_019458.2	3408986	GGGGC	G,*	.	.	.	.	.	.
NC_019458.2	3409002	T	C	.	.	.	.	.	.
NC_019458.2	3409003	G	C	.	.	.	.	.	.
NC_019458.2	3409008	C	T	.	.	.	.	.	.
NC_019458.2	3409130	G	GTGAGCTCCGAGGTCAGCAGAATGGGCTGACATT,GTGAGCTCCGAGGTCAGCA,GT,GTGAGCTCCGAGGTCAGCAGAATGGGCT	.	.	.	.	.	.
NC_019458.2	3409132	A	AGCTCCGAGGTCAGCAGAATGGGCTGACATTGAGATGCCGGGGG	.	.	.	.	.	.
NC_019458.2	3409134	A	T	.	.	.	.	.	.
NC_019458.2	3409346	C	T	.	.	.	.	.	.
NC_019458.2	3409710	C	CCTCCAGGGCAGGG	.	.	.	.	.	.
NC_019458.2	3409747	T	C	.	.	.	.	.	.
NC_019458.2	3409945	G	C	.	.	.	.	.	.
NC_019458.2	3409987	C	T	.	.	.	.	.	.
NC_019458.2	3410062	G	A	.	.	.	.	.	.
NC_019458.2	3410067	G	C	.	.	.	.	.	.
NC_019458.2	3410072	CA	C	.	.	.	.	.	.
NC_019458.2	3410095	A	G	.	.	.	.	.	.
NC_019458.2	3410217	A	G	.	.	.	.	.	.
NC_019458.2	3410222	G	A	.	.	.	.	.	.
NC_019458.2	3410223	C	T	.	.	.	.	.	.
NC_019458.2	3410444	T	G	.	.	.	.	.	.
NC_019458.2	3410466	A	G	.	.	.	.	.	.
NC_019458.2	3410467	C	T	.	.	.	.	.	.
NC_019458.2	3410508	ACG	A	.	.	.	.	.	.
NC_019458.2	3410510	G	A,*	.	.	.	.	.	.
NC_019458.2	3410627	G	A	.	.	.	.	.	.
NC_019458.2	3410725	C	A	.	.	.	.	.	.
NC_019458.2	3410758	G	A	.	.	.	.	.	.
NC_019458.2	3410766	C	T	.	.	.	.	.	.
NC_019458.2	3410789	T	C	.	.	.	.	.	.
NC_019458.2	3410832	T	G	.	.	.	.	.	.
NC_019458.2	3410878	G	A	.	.	.	.	.	.
NC_019458.2	3410902	G	C	.	.	.	.	.	.
NC_019458.2	3410948	T	C	.	.	.	.	.	.
NC_019458.2	3410960	A	G	.	.	.	.	.	.
NC_019458.2	3410963	G	A	.	.	.	.	.	.
NC_019458.2	3410972	A	G	.	.	.	.	.	.
NC_019458.2	3411005	T	G	.	.	.	.	.	.
NC_019458.2	3411006	T	A	.	.	.	.	.	.
NC_019458.2	3411116	A	AC	.	.	.	.	.	.
NC_019458.2	3411122	G	GCCTCCTGCCCATCCCTGGGCTGTGGGCGTGAGTCTGGTTCCTCGATCAGCTGTCTCGCGCT,GCCTCCTGCCCATCACTGGGCTGTGGGCGTGAGTCTGGTTCCTCGATCAGCTGTCTCGCGCT,GCCTCCTGCCCATCCCTGGGCTGTGGGCGTGAGTCTGGTTCCTCGATCAGCTGTCTTGCGCT,GCCTCCTGCCCATCCCTGGGCTGTGGGAGTGAGTCTGGTTCCTCGATCAGCTGTCTCGCGCT,GTCGGCTGTCTCGTGCT	.	.	.	.	.	.
NC_019458.2	3411195	C	T	.	.	.	.	.	.
NC_019458.2	3411240	G	A	.	.	.	.	.	.
NC_019458.2	3411258	G	T	.	.	.	.	.	.
NC_019458.2	3411267	C	T	.	.	.	.	.	.
NC_019458.2	3411364	T	C	.	.	.	.	.	.
NC_019458.2	3411494	C	T	.	.	.	.	.	.
NC_019458.2	3411511	T	C	.	.	.	.	.	.
NC_019458.2	3411521	A	G	.	.	.	.	.	.
NC_019458.2	3411527	AC	A	.	.	.	.	.	.
NC_019458.2	3411537	A	G	.	.	.	.	.	.
NC_019458.2	3411658	T	C	.	.	.	.	.	.
NC_019458.2	3411683	G	A	.	.	.	.	.	.
NC_019458.2	3411708	C	T	MLPH	LOW	splice_region_variant&synonymous_variant	557	A	gcG/gcA
NC_019458.2	3411751	C	T	MLPH	MODERATE	missense_variant	543	R/K	aGa/aAa
NC_019458.2	3411759	C	T	MLPH	LOW	synonymous_variant	540	L	ctG/ctA
NC_019458.2	3411783	T	C	MLPH	LOW	synonymous_variant	532	R	cgA/cgG
NC_019458.2	3411807	G	T	MLPH	MODERATE	missense_variant&splice_region_variant	524	D/E	gaC/gaA
NC_019458.2	3411866	A	G	.	.	.	.	.	.
NC_019458.2	3411954	AAGAAACCGTGCCCCACACTCTGTGTGAGGTCTAGAGCTGTGCACTGCGCATGCGTGTGT	A	.	.	.	.	.	.
NC_019458.2	3412013	TAGAAACCGTGCCCCACACTCTGTGTGAGGTCTG	T,*	.	.	.	.	.	.
NC_019458.2	3412051	TGGG	T	.	.	.	.	.	.
NC_019458.2	3412056	ACCGCGCATATGG	A	.	.	.	.	.	.
NC_019458.2	3412070	T	TGCGA	.	.	.	.	.	.
NC_019458.2	3412071	GCTAAGTC	G	.	.	.	.	.	.
NC_019458.2	3412084	C	T	.	.	.	.	.	.
NC_019458.2	3412085	A	G	.	.	.	.	.	.
NC_019458.2	3412086	G	A	.	.	.	.	.	.
NC_019458.2	3412089	CT	C	.	.	.	.	.	.
NC_019458.2	3412095	C	A	.	.	.	.	.	.
NC_019458.2	3412096	A	G	.	.	.	.	.	.
NC_019458.2	3412097	C	A	.	.	.	.	.	.
NC_019458.2	3412114	T	C	.	.	.	.	.	.
NC_019458.2	3412116	A	C	.	.	.	.	.	.
NC_019458.2	3412125	C	T	.	.	.	.	.	.
NC_019458.2	3412139	T	C	.	.	.	.	.	.
NC_019458.2	3412163	T	C	.	.	.	.	.	.
NC_019458.2	3412216	C	T	.	.	.	.	.	.
NC_019458.2	3412245	C	T	.	.	.	.	.	.
NC_019458.2	3412388	C	T	.	.	.	.	.	.
NC_019458.2	3412481	C	T	.	.	.	.	.	.
NC_019458.2	3412520	T	C	MLPH	LOW	splice_region_variant&intron_variant
NC_019458.2	3412582	T	TAGA	MLPH	LOW	splice_region_variant&intron_variant
NC_019458.2	3412590	C	T	.	.	.	.	.	.
NC_019458.2	3412591	G	A	.	.	.	.	.	.
NC_019458.2	3412637	A	G	.	.	.	.	.	.
NC_019458.2	3412708	T	C	.	.	.	.	.	.
NC_019458.2	3412774	A	G	.	.	.	.	.	.
NC_019458.2	3412804	G	C	.	.	.	.	.	.
NC_019458.2	3412828	C	T	.	.	.	.	.	.
NC_019458.2	3412836	C	G	.	.	.	.	.	.
NC_019458.2	3412849	C	T	.	.	.	.	.	.
NC_019458.2	3412852	T	C	.	.	.	.	.	.
NC_019458.2	3412915	G	A	.	.	.	.	.	.
NC_019458.2	3412921	G	A	.	.	.	.	.	.
NC_019458.2	3412930	C	T	.	.	.	.	.	.
NC_019458.2	3412952	T	C	.	.	.	.	.	.
NC_019458.2	3412979	T	C	.	.	.	.	.	.
NC_019458.2	3413006	G	A	.	.	.	.	.	.
NC_019458.2	3413013	G	A	.	.	.	.	.	.
NC_019458.2	3413018	G	A	.	.	.	.	.	.
NC_019458.2	3413039	CAATGGACATGAGTTTGGGTAAACTCCAAGAGACGGTG	C	.	.	.	.	.	.
NC_019458.2	3413076	GA	G,*	.	.	.	.	.	.
NC_019458.2	3413084	ATGAGTTTGGGTAAACTCCAG	A	.	.	.	.	.	.
NC_019458.2	3413109	CGGTTATGGACATGGAG	CACATGGAG,C	.	.	.	.	.	.
NC_019458.2	3413123	GAGGCC	G	.	.	.	.	.	.
NC_019458.2	3413130	GGCT	G	.	.	.	.	.	.
NC_019458.2	3413140	G	A	.	.	.	.	.	.
NC_019458.2	3413143	T	C	.	.	.	.	.	.
NC_019458.2	3413152	C	CGCAGAGAG,CACAGAGAG	.	.	.	.	.	.
NC_019458.2	3413154	C	CGGA	.	.	.	.	.	.
NC_019458.2	3413156	C	A	.	.	.	.	.	.
NC_019458.2	3413157	C	T	.	.	.	.	.	.
NC_019458.2	3413180	A	T	.	.	.	.	.	.
NC_019458.2	3413185	G	A	.	.	.	.	.	.
NC_019458.2	3413201	T	C	.	.	.	.	.	.
NC_019458.2	3413240	C	T	.	.	.	.	.	.
NC_019458.2	3413255	T	C	.	.	.	.	.	.
NC_019458.2	3413283	G	A	.	.	.	.	.	.
NC_019458.2	3413300	C	T	.	.	.	.	.	.
NC_019458.2	3413336	C	A	.	.	.	.	.	.
NC_019458.2	3413395	A	G	.	.	.	.	.	.
NC_019458.2	3413441	TGGCCCC	T	.	.	.	.	.	.
NC_019458.2	3413462	G	A	.	.	.	.	.	.
NC_019458.2	3413504	TC	T	.	.	.	.	.	.
NC_019458.2	3413562	C	T	.	.	.	.	.	.
NC_019458.2	3413584	C	T	.	.	.	.	.	.
NC_019458.2	3413604	T	C	.	.	.	.	.	.
NC_019458.2	3413671	C	A	.	.	.	.	.	.
NC_019458.2	3413692	A	G	.	.	.	.	.	.
NC_019458.2	3413721	A	G	.	.	.	.	.	.
NC_019458.2	3413742	A	C	.	.	.	.	.	.
NC_019458.2	3413762	A	G	.	.	.	.	.	.
NC_019458.2	3413775	G	GGGCAGGCTGAGGGGT	.	.	.	.	.	.
NC_019458.2	3413778	C	T	.	.	.	.	.	.
NC_019458.2	3413787	C	T	.	.	.	.	.	.
NC_019458.2	3413791	C	A	.	.	.	.	.	.
NC_019458.2	3413797	T	A	.	.	.	.	.	.
NC_019458.2	3413808	GCTGCCTGCGTGGAGGCCCCCGTGCTCT	G	.	.	.	.	.	.
NC_019458.2	3413823	GC	G	.	.	.	.	.	.
NC_019458.2	3413835	T	TG	.	.	.	.	.	.
NC_019458.2	3413882	A	G	.	.	.	.	.	.
NC_019458.2	3413889	A	G	.	.	.	.	.	.
NC_019458.2	3413909	C	A	.	.	.	.	.	.
NC_019458.2	3413942	G	A	.	.	.	.	.	.
NC_019458.2	3413972	T	C	.	.	.	.	.	.
NC_019458.2	3413995	T	C	.	.	.	.	.	.
NC_019458.2	3413997	T	C	.	.	.	.	.	.
NC_019458.2	3414084	G	A	.	.	.	.	.	.
NC_019458.2	3414116	C	T	.	.	.	.	.	.
NC_019458.2	3414141	T	C	.	.	.	.	.	.
NC_019458.2	3414149	C	A	.	.	.	.	.	.
NC_019458.2	3414181	C	T	.	.	.	.	.	.
NC_019458.2	3414218	C	G	.	.	.	.	.	.
NC_019458.2	3414225	C	T	.	.	.	.	.	.
NC_019458.2	3414233	G	A	.	.	.	.	.	.
NC_019458.2	3414255	C	T	.	.	.	.	.	.
NC_019458.2	3414262	C	T	.	.	.	.	.	.
NC_019458.2	3414276	G	A	.	.	.	.	.	.
NC_019458.2	3414318	C	T	.	.	.	.	.	.
NC_019458.2	3414319	G	A	.	.	.	.	.	.
NC_019458.2	3414346	T	C	MLPH	MODERATE	missense_variant&splice_region_variant	504	K/E	Aag/Gag
NC_019458.2	3414368	G	A	MLPH	LOW	synonymous_variant	496	H	caC/caT
NC_019458.2	3414476	A	G	.	.	.	.	.	.
NC_019458.2	3414510	C	T	.	.	.	.	.	.
NC_019458.2	3414594	G	A	.	.	.	.	.	.
NC_019458.2	3414626	A	G	.	.	.	.	.	.
NC_019458.2	3414628	C	T	.	.	.	.	.	.
NC_019458.2	3414645	G	T	.	.	.	.	.	.
NC_019458.2	3414650	T	C	.	.	.	.	.	.
NC_019458.2	3414669	A	C	.	.	.	.	.	.
NC_019458.2	3414689	GA	G	.	.	.	.	.	.
NC_019458.2	3414732	G	A	.	.	.	.	.	.
NC_019458.2	3414756	C	T	.	.	.	.	.	.
NC_019458.2	3414757	G	T	.	.	.	.	.	.
NC_019458.2	3414833	G	T	.	.	.	.	.	.
NC_019458.2	3414846	G	A	.	.	.	.	.	.
NC_019458.2	3414861	C	T	.	.	.	.	.	.
NC_019458.2	3414876	C	T	.	.	.	.	.	.
NC_019458.2	3414898	T	C	.	.	.	.	.	.
NC_019458.2	3414929	C	T	.	.	.	.	.	.
NC_019458.2	3414931	G	A	.	.	.	.	.	.
NC_019458.2	3414941	T	C	.	.	.	.	.	.
NC_019458.2	3414942	G	A	.	.	.	.	.	.
NC_019458.2	3414949	CT	C	.	.	.	.	.	.
NC_019458.2	3414983	A	G	.	.	.	.	.	.
NC_019458.2	3415013	G	A	.	.	.	.	.	.
NC_019458.2	3415039	A	T	.	.	.	.	.	.
NC_019458.2	3415046	C	T	.	.	.	.	.	.
NC_019458.2	3415093	A	C	.	.	.	.	.	.
NC_019458.2	3415100	C	T	.	.	.	.	.	.
NC_019458.2	3415106	G	C	.	.	.	.	.	.
NC_019458.2	3415114	T	C	.	.	.	.	.	.
NC_019458.2	3415125	A	G	.	.	.	.	.	.
NC_019458.2	3415128	T	C	.	.	.	.	.	.
NC_019458.2	3415237	A	T	MLPH	LOW	splice_region_variant&intron_variant
NC_019458.2	3415256	C	T	.	.	.	.	.	.
NC_019458.2	3415308	G	T	.	.	.	.	.	.
NC_019458.2	3415336	T	C	.	.	.	.	.	.
NC_019458.2	3415371	T	C	.	.	.	.	.	.
NC_019458.2	3415400	A	G	.	.	.	.	.	.
NC_019458.2	3415429	A	G	.	.	.	.	.	.
NC_019458.2	3415444	C	T	.	.	.	.	.	.
NC_019458.2	3415513	G	C	.	.	.	.	.	.
NC_019458.2	3415527	C	T	.	.	.	.	.	.
NC_019458.2	3415598	A	G	.	.	.	.	.	.
NC_019458.2	3415629	T	G	.	.	.	.	.	.
NC_019458.2	3415631	ATGAAAG	A	.	.	.	.	.	.
NC_019458.2	3415656	T	C	.	.	.	.	.	.
NC_019458.2	3415671	C	T	.	.	.	.	.	.
NC_019458.2	3415679	C	T	.	.	.	.	.	.
NC_019458.2	3415701	C	T	.	.	.	.	.	.
NC_019458.2	3415769	C	T	.	.	.	.	.	.
NC_019458.2	3415771	C	G	.	.	.	.	.	.
NC_019458.2	3415775	CT	C	.	.	.	.	.	.
NC_019458.2	3415799	C	T	.	.	.	.	.	.
NC_019458.2	3415839	CT	CTT,C	.	.	.	.	.	.
NC_019458.2	3415858	G	A	.	.	.	.	.	.
NC_019458.2	3415861	T	C	.	.	.	.	.	.
NC_019458.2	3415883	T	C	.	.	.	.	.	.
NC_019458.2	3415990	AG	A	.	.	.	.	.	.
NC_019458.2	3416014	C	T	.	.	.	.	.	.
NC_019458.2	3416573	G	C	.	.	.	.	.	.
NC_019458.2	3416622	G	A	.	.	.	.	.	.
NC_019458.2	3416636	T	C	.	.	.	.	.	.
NC_019458.2	3416642	T	C	.	.	.	.	.	.
NC_019458.2	3416685	T	C	.	.	.	.	.	.
NC_019458.2	3416741	C	T	.	.	.	.	.	.
NC_019458.2	3416776	C	T	.	.	.	.	.	.
NC_019458.2	3416823	G	A	.	.	.	.	.	.
NC_019458.2	3416844	C	T	.	.	.	.	.	.
NC_019458.2	3416866	C	T	.	.	.	.	.	.
NC_019458.2	3416869	T	C	.	.	.	.	.	.
NC_019458.2	3416926	C	T	.	.	.	.	.	.
NC_019458.2	3416931	G	A	.	.	.	.	.	.
NC_019458.2	3416958	T	C	.	.	.	.	.	.
NC_019458.2	3417008	T	C	.	.	.	.	.	.
NC_019458.2	3417017	T	C	.	.	.	.	.	.
NC_019458.2	3417045	G	A	.	.	.	.	.	.
NC_019458.2	3417092	G	A	.	.	.	.	.	.
NC_019458.2	3417154	C	T	.	.	.	.	.	.
NC_019458.2	3417156	T	C	.	.	.	.	.	.
NC_019458.2	3417162	G	C	.	.	.	.	.	.
NC_019458.2	3417164	G	C	.	.	.	.	.	.
NC_019458.2	3417169	A	G	.	.	.	.	.	.
NC_019458.2	3417191	C	T	.	.	.	.	.	.
NC_019458.2	3417192	A	G	.	.	.	.	.	.
NC_019458.2	3417201	A	C	.	.	.	.	.	.
NC_019458.2	3417228	GTGTGGGCTTCACTATGAAGCTCTTC	G	.	.	.	.	.	.
NC_019458.2	3417244	GAAGCTCTTC	G,*	.	.	.	.	.	.
NC_019458.2	3417255	GTGGGCTCCACTATGCA	G	.	.	.	.	.	.
NC_019458.2	3417333	A	G	.	.	.	.	.	.
NC_019458.2	3417400	T	C	.	.	.	.	.	.
NC_019458.2	3417414	A	C	.	.	.	.	.	.
NC_019458.2	3417420	C	T	.	.	.	.	.	.
NC_019458.2	3417434	T	A	.	.	.	.	.	.
NC_019458.2	3417466	T	C	.	.	.	.	.	.
NC_019458.2	3417474	T	C	MLPH	LOW	splice_region_variant&intron_variant
NC_019458.2	3417495	G	A	MLPH	MODERATE	missense_variant	443	R/W	Cgg/Tgg
NC_019458.2	3417497	C	T	MLPH	MODERATE	missense_variant	442	R/Q	cGg/cAg
NC_019458.2	3417505	G	C	MLPH	LOW	synonymous_variant	439	R	cgC/cgG
NC_019458.2	3417507	G	A	MLPH	MODERATE	missense_variant	439	R/C	Cgc/Tgc
NC_019458.2	3417518	GC	G	MLPH	HIGH	frameshift_variant	435	A/X	Gcc/cc
NC_019458.2	3417522	C	A	MLPH	MODERATE	missense_variant	434	G/W	Ggg/Tgg
NC_019458.2	3417526	GCCCCCCCCCCCCCCCCCCCCCCC	G	MLPH	HIGH	frameshift_variant	425-432	GGGGGGGG/X	GGGGGGGGGGGGGGGGGGGGGGGc/c
NC_019458.2	3417550	C	G	MLPH	LOW	synonymous_variant	424	G	ggG/ggC
NC_019458.2	3417554	C	T	MLPH	MODERATE	missense_variant	423	G/E	gGg/gAg
NC_019458.2	3417557	G	A	MLPH	MODERATE	missense_variant	422	P/L	cCg/cTg
NC_019458.2	3417563	A	G	MLPH	MODERATE	missense_variant	420	V/A	gTg/gCg
NC_019458.2	3417573	C	T	MLPH	MODERATE	missense_variant	417	A/T	Gca/Aca
NC_019458.2	3417628	G	C	MLPH	MODERATE	missense_variant	398	C/W	tgC/tgG
NC_019458.2	3417645	C	T	MLPH	MODERATE	missense_variant	393	G/S	Ggc/Agc
NC_019458.2	3417654	G	T	MLPH	MODERATE	missense_variant	390	P/T	Ccg/Acg
NC_019458.2	3417668	A	AGG	.	.	.	.	.	.
NC_019458.2	3417679	A	G	.	.	.	.	.	.
NC_019458.2	3417693	T	C	.	.	.	.	.	.
NC_019458.2	3417694	G	A	.	.	.	.	.	.
NC_019458.2	3417700	GC	G	.	.	.	.	.	.
NC_019458.2	3417716	G	C	.	.	.	.	.	.
NC_019458.2	3417721	G	A	.	.	.	.	.	.
NC_019458.2	3417733	A	C	.	.	.	.	.	.
NC_019458.2	3417754	C	T	.	.	.	.	.	.
NC_019458.2	3417757	C	T	.	.	.	.	.	.
NC_019458.2	3417759	G	T	.	.	.	.	.	.
NC_019458.2	3417763	T	C	.	.	.	.	.	.
NC_019458.2	3417767	T	C	.	.	.	.	.	.
NC_019458.2	3417775	T	C	.	.	.	.	.	.
NC_019458.2	3417831	T	G	.	.	.	.	.	.
NC_019458.2	3417855	T	C	.	.	.	.	.	.
NC_019458.2	3417865	T	C	.	.	.	.	.	.
NC_019458.2	3417925	T	C	MLPH	MODERATE	missense_variant	375	N/S	aAc/aGc
NC_019458.2	3417932	C	T	MLPH	MODERATE	missense_variant	373	G/S	Ggc/Agc
NC_019458.2	3417969	T	C	MLPH	LOW	synonymous_variant	360	A	gcA/gcG
NC_019458.2	3417972	G	A	MLPH	LOW	synonymous_variant	359	S	tcC/tcT
NC_019458.2	3418042	G	A	MLPH	MODERATE	missense_variant	336	A/V	gCg/gTg
NC_019458.2	3418135	C	G	.	.	.	.	.	.
NC_019458.2	3418159	C	T	.	.	.	.	.	.
NC_019458.2	3418166	C	T	.	.	.	.	.	.
NC_019458.2	3418281	C	A	.	.	.	.	.	.
NC_019458.2	3418318	A	AGGC	.	.	.	.	.	.
NC_019458.2	3418319	ATATCT	A	.	.	.	.	.	.
NC_019458.2	3418325	C	CCAGT	.	.	.	.	.	.
NC_019458.2	3418526	C	T	.	.	.	.	.	.
NC_019458.2	3418631	C	T	.	.	.	.	.	.
NC_019458.2	3418672	A	G	.	.	.	.	.	.
NC_019458.2	3418705	A	AG	.	.	.	.	.	.
NC_019458.2	3418706	C	T	.	.	.	.	.	.
NC_019458.2	3418719	C	T	.	.	.	.	.	.
NC_019458.2	3418787	A	AC	.	.	.	.	.	.
NC_019458.2	3418876	T	A	.	.	.	.	.	.
NC_019458.2	3418885	A	G	.	.	.	.	.	.
NC_019458.2	3418960	T	C	.	.	.	.	.	.
NC_019458.2	3418991	AG	A	.	.	.	.	.	.
NC_019458.2	3419007	C	T	.	.	.	.	.	.
NC_019458.2	3419095	T	C	.	.	.	.	.	.
NC_019458.2	3419112	C	T	.	.	.	.	.	.
NC_019458.2	3419225	C	T	.	.	.	.	.	.
NC_019458.2	3419271	A	AGGT	.	.	.	.	.	.
NC_019458.2	3419274	A	T	.	.	.	.	.	.
NC_019458.2	3419297	T	C	.	.	.	.	.	.
NC_019458.2	3419305	T	C	.	.	.	.	.	.
NC_019458.2	3419332	A	G	.	.	.	.	.	.
NC_019458.2	3419372	T	TG	.	.	.	.	.	.
NC_019458.2	3419405	A	AACTG	.	.	.	.	.	.
NC_019458.2	3419412	G	C	.	.	.	.	.	.
NC_019458.2	3419432	C	T	.	.	.	.	.	.
NC_019458.2	3419482	T	C	.	.	.	.	.	.
NC_019458.2	3419560	C	T	.	.	.	.	.	.
NC_019458.2	3419652	A	G	.	.	.	.	.	.
NC_019458.2	3419660	C	T	.	.	.	.	.	.
NC_019458.2	3419737	C	A	.	.	.	.	.	.
NC_019458.2	3419779	CACCACTGGGGACGTGGGCTGGGAAGG	C	.	.	.	.	.	.
NC_019458.2	3419791	CGTGGGCTGGGAAGGACCGCTGGGGAT	C,*	.	.	.	.	.	.
NC_019458.2	3419817	T	C,*	.	.	.	.	.	.
NC_019458.2	3419835	T	C	.	.	.	.	.	.
NC_019458.2	3419857	G	A	.	.	.	.	.	.
NC_019458.2	3419871	C	T	.	.	.	.	.	.
NC_019458.2	3419872	A	G	.	.	.	.	.	.
NC_019458.2	3419897	C	CG	.	.	.	.	.	.
NC_019458.2	3419904	G	A	.	.	.	.	.	.
NC_019458.2	3419923	G	A	.	.	.	.	.	.
NC_019458.2	3419941	A	G	.	.	.	.	.	.
NC_019458.2	3419942	C	T	.	.	.	.	.	.
NC_019458.2	3419953	C	T	.	.	.	.	.	.
NC_019458.2	3420095	C	T	.	.	.	.	.	.
NC_019458.2	3420109	G	A	.	.	.	.	.	.
NC_019458.2	3420111	C	T	.	.	.	.	.	.
NC_019458.2	3420132	G	A	.	.	.	.	.	.
NC_019458.2	3420165	G	A	.	.	.	.	.	.
NC_019458.2	3420241	G	A	.	.	.	.	.	.
NC_019458.2	3420332	C	T	.	.	.	.	.	.
NC_019458.2	3420410	A	G	.	.	.	.	.	.
NC_019458.2	3420419	C	T	.	.	.	.	.	.
NC_019458.2	3420490	T	C	.	.	.	.	.	.
NC_019458.2	3420496	C	T	.	.	.	.	.	.
NC_019458.2	3420501	C	T	.	.	.	.	.	.
NC_019458.2	3420645	A	G	.	.	.	.	.	.
NC_019458.2	3420657	C	T	.	.	.	.	.	.
NC_019458.2	3420660	A	G	.	.	.	.	.	.
NC_019458.2	3420683	T	A	.	.	.	.	.	.
NC_019458.2	3420805	G	T	.	.	.	.	.	.
NC_019458.2	3420816	T	C	.	.	.	.	.	.
NC_019458.2	3420820	G	A	.	.	.	.	.	.
NC_019458.2	3420853	T	C	.	.	.	.	.	.
NC_019458.2	3420907	C	T	.	.	.	.	.	.
NC_019458.2	3420986	C	T	.	.	.	.	.	.
NC_019458.2	3421021	G	A	.	.	.	.	.	.
NC_019458.2	3421024	T	G	.	.	.	.	.	.
NC_019458.2	3421193	T	C	.	.	.	.	.	.
NC_019458.2	3421211	G	GCCAC	.	.	.	.	.	.
NC_019458.2	3421220	CA	C	.	.	.	.	.	.
NC_019458.2	3421225	T	G,C	.	.	.	.	.	.
NC_019458.2	3421244	C	T	.	.	.	.	.	.
NC_019458.2	3421253	C	A	.	.	.	.	.	.
NC_019458.2	3421279	A	G	.	.	.	.	.	.
NC_019458.2	3421296	G	A	.	.	.	.	.	.
NC_019458.2	3421328	A	G	.	.	.	.	.	.
NC_019458.2	3421334	T	C	.	.	.	.	.	.
NC_019458.2	3421371	G	C	.	.	.	.	.	.
NC_019458.2	3421395	T	C	.	.	.	.	.	.
NC_019458.2	3421431	A	G	.	.	.	.	.	.
NC_019458.2	3421443	C	T	.	.	.	.	.	.
NC_019458.2	3421599	C	G,T	.	.	.	.	.	.
NC_019458.2	3421939	T	C	.	.	.	.	.	.
NC_019458.2	3424056	A	G	.	.	.	.	.	.
NC_019458.2	3424162	A	G	.	.	.	.	.	.
NC_019458.2	3424163	C	T	.	.	.	.	.	.
NC_019458.2	3424223	T	C	.	.	.	.	.	.
NC_019458.2	3424228	C	T	.	.	.	.	.	.
NC_019458.2	3424336	C	T	.	.	.	.	.	.
NC_019458.2	3424510	C	T	.	.	.	.	.	.
NC_019458.2	3424537	T	C	.	.	.	.	.	.
NC_019458.2	3424617	A	ACCGAACCC	.	.	.	.	.	.
NC_019458.2	3424638	C	G	.	.	.	.	.	.
NC_019458.2	3424654	A	G	.	.	.	.	.	.
NC_019458.2	3424675	A	G	.	.	.	.	.	.
NC_019458.2	3424707	A	C	.	.	.	.	.	.
NC_019458.2	3424800	C	A	.	.	.	.	.	.
NC_019458.2	3424858	T	C	.	.	.	.	.	.
NC_019458.2	3424867	C	T	.	.	.	.	.	.
NC_019458.2	3424884	C	CCT	MLPH	LOW	splice_region_variant&intron_variant
NC_019458.2	3425024	G	T	MLPH	LOW	synonymous_variant	279	T	acC/acA
NC_019458.2	3425075	A	G	.	.	.	.	.	.
NC_019458.2	3425155	A	G	.	.	.	.	.	.
NC_019458.2	3425201	G	A	.	.	.	.	.	.
NC_019458.2	3425245	CA	C	.	.	.	.	.	.
NC_019458.2	3425247	GCACTCAC	G	.	.	.	.	.	.
NC_019458.2	3425256	C	T	.	.	.	.	.	.
NC_019458.2	3425270	T	C	.	.	.	.	.	.
NC_019458.2	3425278	T	C	.	.	.	.	.	.
NC_019458.2	3425292	G	T	.	.	.	.	.	.
NC_019458.2	3425302	G	T	.	.	.	.	.	.
NC_019458.2	3425371	G	A	.	.	.	.	.	.
NC_019458.2	3425381	T	C	.	.	.	.	.	.
NC_019458.2	3425408	A	G	.	.	.	.	.	.
NC_019458.2	3425418	T	C	.	.	.	.	.	.
NC_019458.2	3425425	T	C	.	.	.	.	.	.
NC_019458.2	3425511	T	C	.	.	.	.	.	.
NC_019458.2	3425556	C	T	.	.	.	.	.	.
NC_019458.2	3425557	A	G	.	.	.	.	.	.
NC_019458.2	3425614	A	G	.	.	.	.	.	.
NC_019458.2	3425663	T	C	.	.	.	.	.	.
NC_019458.2	3425717	C	T	.	.	.	.	.	.
NC_019458.2	3425739	T	C	.	.	.	.	.	.
NC_019458.2	3425808	A	G	.	.	.	.	.	.
NC_019458.2	3425840	C	T	.	.	.	.	.	.
NC_019458.2	3425910	A	G	.	.	.	.	.	.
NC_019458.2	3425938	G	A	.	.	.	.	.	.
NC_019458.2	3426003	A	G	.	.	.	.	.	.
NC_019458.2	3426119	G	A	.	.	.	.	.	.
NC_019458.2	3426230	G	A	.	.	.	.	.	.
NC_019458.2	3426256	G	A	.	.	.	.	.	.
NC_019458.2	3426479	C	T	.	.	.	.	.	.
NC_019458.2	3426572	C	T	.	.	.	.	.	.
NC_019458.2	3426595	T	C	.	.	.	.	.	.
NC_019458.2	3426627	G	C	.	.	.	.	.	.
NC_019458.2	3426689	C	T	.	.	.	.	.	.
NC_019458.2	3426699	A	T	.	.	.	.	.	.
NC_019458.2	3426710	C	T	.	.	.	.	.	.
NC_019458.2	3426732	T	C	.	.	.	.	.	.
NC_019458.2	3426788	T	G	.	.	.	.	.	.
NC_019458.2	3426790	G	A	.	.	.	.	.	.
NC_019458.2	3426850	C	T	.	.	.	.	.	.
NC_019458.2	3426872	G	A	.	.	.	.	.	.
NC_019458.2	3426883	T	C	.	.	.	.	.	.
NC_019458.2	3426960	G	A	.	.	.	.	.	.
NC_019458.2	3426963	G	A	.	.	.	.	.	.
NC_019458.2	3426982	G	A	.	.	.	.	.	.
NC_019458.2	3427050	T	C	.	.	.	.	.	.
NC_019458.2	3427066	G	T	.	.	.	.	.	.
NC_019458.2	3427088	T	A	.	.	.	.	.	.
NC_019458.2	3427142	T	C	MLPH	MODERATE	missense_variant&splice_region_variant	278	R/G	Agg/Ggg
NC_019458.2	3427218	G	A	MLPH	LOW	synonymous_variant	252	A	gcC/gcT
NC_019458.2	3427223	G	C	MLPH	MODERATE	missense_variant	251	P/A	Cct/Gct
NC_019458.2	3427239	C	T	MLPH	LOW	synonymous_variant	245	Q	caG/caA
NC_019458.2	3427366	C	T	.	.	.	.	.	.
NC_019458.2	3427368	G	T	.	.	.	.	.	.
NC_019458.2	3427417	C	T	.	.	.	.	.	.
NC_019458.2	3427452	A	G	.	.	.	.	.	.
NC_019458.2	3427475	T	C	.	.	.	.	.	.
NC_019458.2	3427542	A	G	.	.	.	.	.	.
NC_019458.2	3427543	C	T	.	.	.	.	.	.
NC_019458.2	3427622	T	C	.	.	.	.	.	.
NC_019458.2	3427752	G	A	.	.	.	.	.	.
NC_019458.2	3427843	G	A,*	.	.	.	.	.	.
NC_019458.2	3427844	AGGGACCACACAGCC	A	.	.	.	.	.	.
NC_019458.2	3427846	GGA	G,*	.	.	.	.	.	.
NC_019458.2	3427856	G	C,*	.	.	.	.	.	.
NC_019458.2	3427868	C	A	.	.	.	.	.	.
NC_019458.2	3427869	C	G	.	.	.	.	.	.
NC_019458.2	3427871	G	A	.	.	.	.	.	.
NC_019458.2	3428000	G	A	.	.	.	.	.	.
NC_019458.2	3428076	G	A	.	.	.	.	.	.
NC_019458.2	3428233	G	A	.	.	.	.	.	.
NC_019458.2	3428291	C	T	MLPH	MODERATE	missense_variant	207	G/S	Ggc/Agc
NC_019458.2	3431307	C	T	.	.	.	.	.	.
NC_019458.2	3431319	G	T	.	.	.	.	.	.
NC_019458.2	3431410	A	T	.	.	.	.	.	.
NC_019458.2	3431416	A	T	.	.	.	.	.	.
NC_019458.2	3431419	A	AGCACC	.	.	.	.	.	.
NC_019458.2	3431428	G	T	.	.	.	.	.	.
NC_019458.2	3431431	G	C	.	.	.	.	.	.
NC_019458.2	3431434	G	A	.	.	.	.	.	.
NC_019458.2	3431461	C	G	.	.	.	.	.	.
NC_019458.2	3431515	A	T	.	.	.	.	.	.
NC_019458.2	3431571	C	T	.	.	.	.	.	.
NC_019458.2	3431593	C	G	.	.	.	.	.	.
NC_019458.2	3431598	TCC	T	.	.	.	.	.	.
NC_019458.2	3431610	C	A	.	.	.	.	.	.
NC_019458.2	3431618	C	CAA	.	.	.	.	.	.
NC_019458.2	3431619	GCGC	G	.	.	.	.	.	.
NC_019458.2	3431624	A	AG	.	.	.	.	.	.
NC_019458.2	3431634	CTGTGT	CAATGTGT,C	.	.	.	.	.	.
NC_019458.2	3431635	T	A,C	.	.	.	.	.	.
NC_019458.2	3431649	C	CA	.	.	.	.	.	.
NC_019458.2	3433480	G	GCGCTGAGCAGACAGGCATTATCCTGCCCGAGCCGGGCTTCCTTTCCTGCCCCCCCACCCCCACT	.	.	.	.	.	.
NC_019458.2	3433634	GC	G	.	.	.	.	.	.
NC_019458.2	3433683	T	C	.	.	.	.	.	.
NC_019458.2	3433689	C	T	.	.	.	.	.	.
NC_019458.2	3433744	G	T	.	.	.	.	.	.
NC_019458.2	3433754	C	A	.	.	.	.	.	.
NC_019458.2	3433756	C	T	.	.	.	.	.	.
NC_019458.2	3433780	A	G	.	.	.	.	.	.
NC_019458.2	3433815	C	T	.	.	.	.	.	.
NC_019458.2	3433816	T	C	.	.	.	.	.	.
NC_019458.2	3433826	A	G	.	.	.	.	.	.
NC_019458.2	3433831	G	GGCCCGCA	.	.	.	.	.	.
NC_019458.2	3433832	G	GCCCGCAGC	.	.	.	.	.	.
NC_019458.2	3433838	G	T	.	.	.	.	.	.
NC_019458.2	3433840	C	T	.	.	.	.	.	.
NC_019458.2	3433842	G	C	.	.	.	.	.	.
NC_019458.2	3433875	G	A	.	.	.	.	.	.
NC_019458.2	3433916	C	CGA	.	.	.	.	.	.
NC_019458.2	3433951	T	C	.	.	.	.	.	.
NC_019458.2	3434033	AGCACCCCCCATACCGGGGCAAGGCCTCAAGAAATAC	A	.	.	.	.	.	.
NC_019458.2	3434054	AGGCCTCAAGAAATACGCGCCCCCCCCACCGGGGCAG	A,*	.	.	.	.	.	.
NC_019458.2	3434079	C	A,*	.	.	.	.	.	.
NC_019458.2	3434090	G	A,*	.	.	.	.	.	.
NC_019458.2	3434131	C	A	.	.	.	.	.	.
NC_019458.2	3434170	G	C	.	.	.	.	.	.
NC_019458.2	3434176	T	G	.	.	.	.	.	.
NC_019458.2	3434177	T	C	.	.	.	.	.	.
NC_019458.2	3434256	T	C	.	.	.	.	.	.
NC_019458.2	3434265	GGCTGC	G	.	.	.	.	.	.
NC_019458.2	3434268	TGCAGGTGGCGGGAACCCCCTGTGGCGG	T,*	.	.	.	.	.	.
NC_019458.2	3434271	AGGTGGCGGGAACCCCCTGTGGCGGGCTGG	A,*	.	.	.	.	.	.
NC_019458.2	3434302	TGCTGGCG	T	.	.	.	.	.	.
NC_019458.2	3434313	G	C	.	.	.	.	.	.
NC_019458.2	3434352	A	T	.	.	.	.	.	.
NC_019458.2	3434353	T	C	.	.	.	.	.	.
NC_019458.2	3434397	A	AC	.	.	.	.	.	.
NC_019458.2	3434577	G	T	.	.	.	.	.	.
NC_019458.2	3434587	G	T,A	.	.	.	.	.	.
NC_019458.2	3434650	G	C,T	.	.	.	.	.	.
NC_019458.2	3434676	C	T	.	.	.	.	.	.
NC_019458.2	3434680	T	C	.	.	.	.	.	.
NC_019458.2	3434684	TAA	T	.	.	.	.	.	.
NC_019458.2	3434694	G	A	.	.	.	.	.	.
NC_019458.2	3434696	C	T	.	.	.	.	.	.
NC_019458.2	3434714	G	A	.	.	.	.	.	.
NC_019458.2	3434719	T	C	.	.	.	.	.	.
NC_019458.2	3434751	C	T	.	.	.	.	.	.
NC_019458.2	3434776	C	A	.	.	.	.	.	.
NC_019458.2	3434778	T	C	.	.	.	.	.	.
NC_019458.2	3434787	CCG	C	.	.	.	.	.	.
NC_019458.2	3434809	G	A	.	.	.	.	.	.
NC_019458.2	3434895	T	C	.	.	.	.	.	.
NC_019458.2	3434964	T	C	.	.	.	.	.	.
NC_019458.2	3434980	T	G	.	.	.	.	.	.
NC_019458.2	3434990	C	T	.	.	.	.	.	.
NC_019458.2	3435056	C	T	.	.	.	.	.	.
NC_019458.2	3435057	A	G	.	.	.	.	.	.
NC_019458.2	3435107	G	T	.	.	.	.	.	.
NC_019458.2	3435161	C	T	.	.	.	.	.	.
NC_019458.2	3435165	C	A	.	.	.	.	.	.
NC_019458.2	3435178	C	A	.	.	.	.	.	.
NC_019458.2	3435187	G	A	.	.	.	.	.	.
NC_019458.2	3435221	G	A	.	.	.	.	.	.
NC_019458.2	3435255	C	T	.	.	.	.	.	.
NC_019458.2	3435260	T	A	.	.	.	.	.	.
NC_019458.2	3435268	A	C	.	.	.	.	.	.
NC_019458.2	3435303	T	G	.	.	.	.	.	.
NC_019458.2	3435366	T	G	.	.	.	.	.	.
NC_019458.2	3435414	G	T	.	.	.	.	.	.
NC_019458.2	3435474	T	C	.	.	.	.	.	.
NC_019458.2	3435664	G	A	MLPH	LOW	synonymous_variant	122	Y	taC/taT
NC_019458.2	3435745	T	TGCA	.	.	.	.	.	.
NC_019458.2	3435831	T	C	MLPH	MODERATE	missense_variant	93	S/G	Agc/Ggc
NC_019458.2	3436006	T	G	.	.	.	.	.	.
NC_019458.2	3436210	A	G	.	.	.	.	.	.
NC_019458.2	3436223	G	A	.	.	.	.	.	.
NC_019458.2	3436228	CTG	C	.	.	.	.	.	.
NC_019458.2	3436231	CTATGTTCATAGA	C	.	.	.	.	.	.
NC_019458.2	3436248	AAATTG	A	.	.	.	.	.	.
NC_019458.2	3436254	CA	C	.	.	.	.	.	.
NC_019458.2	3436256	TTTCAG	T	.	.	.	.	.	.
NC_019458.2	3436276	T	A	.	.	.	.	.	.
NC_019458.2	3436288	C	T	.	.	.	.	.	.
NC_019458.2	3436332	G	T	.	.	.	.	.	.
NC_019458.2	3436340	A	G	.	.	.	.	.	.
NC_019458.2	3436352	T	C	.	.	.	.	.	.
NC_019458.2	3436353	G	A	.	.	.	.	.	.
NC_019458.2	3436358	T	C	.	.	.	.	.	.
NC_019458.2	3436370	A	C	.	.	.	.	.	.
NC_019458.2	3436385	T	C	.	.	.	.	.	.
NC_019458.2	3436386	G	A	.	.	.	.	.	.
NC_019458.2	3436408	A	G	.	.	.	.	.	.
NC_019458.2	3436420	A	G	.	.	.	.	.	.
NC_019458.2	3436524	G	C	.	.	.	.	.	.
NC_019458.2	3436552	C	T	.	.	.	.	.	.
NC_019458.2	3436569	G	A	.	.	.	.	.	.
NC_019458.2	3436602	G	A	.	.	.	.	.	.
NC_019458.2	3436649	T	C	.	.	.	.	.	.
NC_019458.2	3436652	ACCCTT	A	.	.	.	.	.	.
NC_019458.2	3436706	C	T	.	.	.	.	.	.
NC_019458.2	3436713	T	A	.	.	.	.	.	.
NC_019458.2	3436734	G	A	.	.	.	.	.	.
NC_019458.2	3436739	T	C	.	.	.	.	.	.
NC_019458.2	3436791	A	G	.	.	.	.	.	.
NC_019458.2	3436795	C	G	.	.	.	.	.	.
NC_019458.2	3436847	G	T	.	.	.	.	.	.
NC_019458.2	3436873	C	T	.	.	.	.	.	.
NC_019458.2	3436939	T	G	.	.	.	.	.	.
NC_019458.2	3436990	T	C	.	.	.	.	.	.
NC_019458.2	3436991	G	C	.	.	.	.	.	.
NC_019458.2	3436998	G	A	.	.	.	.	.	.
NC_019458.2	3437008	T	G	.	.	.	.	.	.
NC_019458.2	3437031	A	G	.	.	.	.	.	.
NC_019458.2	3437064	G	A	.	.	.	.	.	.
NC_019458.2	3437075	C	T	.	.	.	.	.	.
NC_019458.2	3437119	C	T	.	.	.	.	.	.
NC_019458.2	3437156	C	T	.	.	.	.	.	.
NC_019458.2	3437160	G	C	.	.	.	.	.	.
NC_019458.2	3437161	G	A	.	.	.	.	.	.
NC_019458.2	3437176	C	T	.	.	.	.	.	.
NC_019458.2	3437211	C	T	.	.	.	.	.	.
NC_019458.2	3437213	C	T	.	.	.	.	.	.
NC_019458.2	3437272	C	T	.	.	.	.	.	.
NC_019458.2	3437276	A	AC	.	.	.	.	.	.
NC_019458.2	3437322	T	C	.	.	.	.	.	.
NC_019458.2	3437334	C	T	.	.	.	.	.	.
NC_019458.2	3437337	A	G	.	.	.	.	.	.
NC_019458.2	3437375	C	G	.	.	.	.	.	.
NC_019458.2	3437399	T	C	.	.	.	.	.	.
NC_019458.2	3437401	T	C	.	.	.	.	.	.
NC_019458.2	3437496	A	G	.	.	.	.	.	.
NC_019458.2	3437534	A	G	.	.	.	.	.	.
NC_019458.2	3437542	C	T	.	.	.	.	.	.
NC_019458.2	3437546	C	T	.	.	.	.	.	.
NC_019458.2	3437547	A	G	.	.	.	.	.	.
NC_019458.2	3437586	G	A	.	.	.	.	.	.
NC_019458.2	3437598	T	C	.	.	.	.	.	.
NC_019458.2	3437693	A	G	.	.	.	.	.	.
NC_019458.2	3437717	G	A	.	.	.	.	.	.
NC_019458.2	3437742	G	A	.	.	.	.	.	.
NC_019458.2	3437760	CGG	C	.	.	.	.	.	.
NC_019458.2	3437763	AGC	A,*	.	.	.	.	.	.
NC_019458.2	3437771	T	C	.	.	.	.	.	.
NC_019458.2	3437805	C	T	.	.	.	.	.	.
NC_019458.2	3437828	C	T	.	.	.	.	.	.
NC_019458.2	3437839	G	A	.	.	.	.	.	.
NC_019458.2	3437865	A	G	.	.	.	.	.	.
NC_019458.2	3437873	T	C	.	.	.	.	.	.
NC_019458.2	3437923	C	T	.	.	.	.	.	.
NC_019458.2	3437940	T	G	.	.	.	.	.	.
NC_019458.2	3437975	A	G	.	.	.	.	.	.
NC_019458.2	3438002	T	C	.	.	.	.	.	.
NC_019458.2	3438003	G	A	.	.	.	.	.	.
NC_019458.2	3438049	A	G	.	.	.	.	.	.
NC_019458.2	3438051	G	T	.	.	.	.	.	.
NC_019458.2	3438088	G	A	.	.	.	.	.	.
NC_019458.2	3438173	G	A	.	.	.	.	.	.
NC_019458.2	3438183	G	A	.	.	.	.	.	.
NC_019458.2	3438308	A	G	.	.	.	.	.	.
NC_019458.2	3438363	G	A	.	.	.	.	.	.
NC_019458.2	3438408	T	C	.	.	.	.	.	.
NC_019458.2	3438412	C	G	.	.	.	.	.	.
NC_019458.2	3438446	T	C	.	.	.	.	.	.
NC_019458.2	3438474	T	C	.	.	.	.	.	.
NC_019458.2	3438475	G	A	.	.	.	.	.	.
NC_019458.2	3438486	C	T	.	.	.	.	.	.
NC_019458.2	3438570	A	G	.	.	.	.	.	.
NC_019458.2	3438637	TGCTGAGTGGGCATAAGGGGAGGA	T	.	.	.	.	.	.
NC_019458.2	3438757	C	T	.	.	.	.	.	.
NC_019458.2	3438758	A	G	.	.	.	.	.	.
NC_019458.2	3438769	C	T	.	.	.	.	.	.
NC_019458.2	3438781	C	T	.	.	.	.	.	.
NC_019458.2	3438790	C	T	.	.	.	.	.	.
NC_019458.2	3438817	G	GT	.	.	.	.	.	.
NC_019458.2	3438840	C	T	.	.	.	.	.	.
NC_019458.2	3438881	CAA	C	.	.	.	.	.	.
NC_019458.2	3438899	A	T	.	.	.	.	.	.
NC_019458.2	3438981	A	G	.	.	.	.	.	.
NC_019458.2	3438989	T	A	.	.	.	.	.	.
NC_019458.2	3438996	G	A	.	.	.	.	.	.
NC_019458.2	3439010	T	C	.	.	.	.	.	.
NC_019458.2	3439107	A	G	.	.	.	.	.	.
NC_019458.2	3439117	T	C	.	.	.	.	.	.
NC_019458.2	3439126	A	C	.	.	.	.	.	.
NC_019458.2	3439168	C	T	.	.	.	.	.	.
NC_019458.2	3439254	T	C	.	.	.	.	.	.
NC_019458.2	3439263	A	G	.	.	.	.	.	.
NC_019458.2	3439281	T	C	.	.	.	.	.	.
NC_019458.2	3439284	C	A	.	.	.	.	.	.
NC_019458.2	3439351	A	G	.	.	.	.	.	.
NC_019458.2	3439455	C	T	.	.	.	.	.	.
NC_019458.2	3439508	A	C	.	.	.	.	.	.
NC_019458.2	3439602	C	G	.	.	.	.	.	.
NC_019458.2	3439630	T	C	.	.	.	.	.	.
NC_019458.2	3439721	T	G	.	.	.	.	.	.
NC_019458.2	3439770	G	A	.	.	.	.	.	.
NC_019458.2	3439895	G	A	.	.	.	.	.	.
NC_019458.2	3439897	G	A	.	.	.	.	.	.
NC_019458.2	3439949	C	T	.	.	.	.	.	.
NC_019458.2	3439981	C	T	.	.	.	.	.	.
NC_019458.2	3439995	T	C	.	.	.	.	.	.
NC_019458.2	3440019	T	C	.	.	.	.	.	.
NC_019458.2	3440113	C	G	.	.	.	.	.	.
NC_019458.2	3440302	T	C	.	.	.	.	.	.
NC_019458.2	3440318	G	A	.	.	.	.	.	.
NC_019458.2	3440360	C	T	.	.	.	.	.	.
NC_019458.2	3440520	A	G	.	.	.	.	.	.
NC_019458.2	3440526	A	C	.	.	.	.	.	.
NC_019458.2	3440652	G	C	.	.	.	.	.	.
NC_019458.2	3440777	A	G	.	.	.	.	.	.
NC_019458.2	3440894	G	C	.	.	.	.	.	.
NC_019458.2	3440968	G	A	.	.	.	.	.	.
NC_019458.2	3440979	T	C	.	.	.	.	.	.
NC_019458.2	3441093	T	A	.	.	.	.	.	.
NC_019458.2	3441094	T	A	.	.	.	.	.	.
NC_019458.2	3441138	C	T	.	.	.	.	.	.
NC_019458.2	3441143	T	C	.	.	.	.	.	.
NC_019458.2	3441174	C	T	.	.	.	.	.	.
NC_019458.2	3441175	A	G	.	.	.	.	.	.
NC_019458.2	3441203	C	T	.	.	.	.	.	.
NC_019458.2	3441259	A	G	.	.	.	.	.	.
NC_019458.2	3441301	T	C	.	.	.	.	.	.
NC_019458.2	3441365	G	A	.	.	.	.	.	.
NC_019458.2	3441379	G	A	.	.	.	.	.	.
NC_019458.2	3441385	T	TC	.	.	.	.	.	.
NC_019458.2	3441433	T	C	.	.	.	.	.	.
NC_019458.2	3441471	G	A	.	.	.	.	.	.
NC_019458.2	3441494	T	C	.	.	.	.	.	.
NC_019458.2	3441547	T	C	.	.	.	.	.	.
NC_019458.2	3441558	T	A	.	.	.	.	.	.
NC_019458.2	3441581	A	T	.	.	.	.	.	.
NC_019458.2	3441621	C	T	.	.	.	.	.	.
NC_019458.2	3441637	A	G	.	.	.	.	.	.
NC_019458.2	3441748	C	T	.	.	.	.	.	.
NC_019458.2	3441774	T	C	.	.	.	.	.	.
NC_019458.2	3441792	A	G	.	.	.	.	.	.
NC_019458.2	3441813	C	T	.	.	.	.	.	.
NC_019458.2	3441814	A	G	.	.	.	.	.	.
NC_019458.2	3442206	C	T	.	.	.	.	.	.
NC_019458.2	3442280	C	T	.	.	.	.	.	.
NC_019458.2	3442429	C	T	.	.	.	.	.	.
NC_019458.2	3442450	T	C	.	.	.	.	.	.
NC_019458.2	3442674	C	T	.	.	.	.	.	.
NC_019458.2	3442681	A	G	.	.	.	.	.	.
NC_019458.2	3442692	T	C	.	.	.	.	.	.
NC_019458.2	3442715	T	C	.	.	.	.	.	.
NC_019458.2	3442828	A	G	.	.	.	.	.	.
NC_019458.2	3442859	T	C	.	.	.	.	.	.
NC_019458.2	3442916	T	G	.	.	.	.	.	.
NC_019458.2	3442929	A	G	.	.	.	.	.	.
NC_019458.2	3442982	G	A	.	.	.	.	.	.
NC_019458.2	3442984	T	C	.	.	.	.	.	.
NC_019458.2	3443006	C	T	.	.	.	.	.	.
NC_019458.2	3443047	A	G	.	.	.	.	.	.
NC_019458.2	3443053	A	G	.	.	.	.	.	.
NC_019458.2	3443080	A	G	.	.	.	.	.	.
NC_019458.2	3443159	C	T	.	.	.	.	.	.
NC_019458.2	3443165	A	C	.	.	.	.	.	.
NC_019458.2	3443213	G	A	.	.	.	.	.	.
NC_019458.2	3443226	C	T	.	.	.	.	.	.
NC_019458.2	3443277	G	T	.	.	.	.	.	.
NC_019458.2	3443446	G	A	.	.	.	.	.	.
NC_019458.2	3443473	C	A	.	.	.	.	.	.
NC_019458.2	3443487	C	A	.	.	.	.	.	.
NC_019458.2	3443505	G	A	.	.	.	.	.	.
NC_019458.2	3443549	T	C	.	.	.	.	.	.
NC_019458.2	3443624	C	T	.	.	.	.	.	.
NC_019458.2	3443643	T	A	.	.	.	.	.	.
NC_019458.2	3443654	G	A	.	.	.	.	.	.
NC_019458.2	3443659	T	C	.	.	.	.	.	.
NC_019458.2	3443670	A	G	.	.	.	.	.	.
NC_019458.2	3443820	T	G	.	.	.	.	.	.
NC_019458.2	3443849	C	T	.	.	.	.	.	.
NC_019458.2	3443892	T	C	.	.	.	.	.	.
NC_019458.2	3444002	A	G	.	.	.	.	.	.
NC_019458.2	3444009	G	A	.	.	.	.	.	.
NC_019458.2	3444025	G	A	.	.	.	.	.	.
NC_019458.2	3444057	T	G	.	.	.	.	.	.
NC_019458.2	3444062	C	T	.	.	.	.	.	.
NC_019458.2	3444096	C	T	.	.	.	.	.	.
NC_019458.2	3444132	C	T	.	.	.	.	.	.
NC_019458.2	3444143	C	T	.	.	.	.	.	.
NC_019458.2	3444147	G	C	.	.	.	.	.	.
NC_019458.2	3444176	C	T	.	.	.	.	.	.
NC_019458.2	3444248	GTCT	G	.	.	.	.	.	.
NC_019458.2	3444266	G	GT,GTT	.	.	.	.	.	.
NC_019458.2	3444286	C	G	.	.	.	.	.	.
NC_019458.2	3444293	C	G	.	.	.	.	.	.
NC_019458.2	3444314	T	C	.	.	.	.	.	.
NC_019458.2	3444357	G	A	.	.	.	.	.	.
NC_019458.2	3444374	A	T	.	.	.	.	.	.
NC_019458.2	3444377	A	G	.	.	.	.	.	.
NC_019458.2	3444384	G	A	.	.	.	.	.	.
NC_019458.2	3444443	C	CT	.	.	.	.	.	.
NC_019458.2	3444462	A	C	.	.	.	.	.	.
NC_019458.2	3444496	TGC	T	.	.	.	.	.	.
NC_019458.2	3444501	T	A	.	.	.	.	.	.
NC_019458.2	3444503	C	A	.	.	.	.	.	.
NC_019458.2	3444537	T	C	.	.	.	.	.	.
NC_019458.2	3444661	A	T	.	.	.	.	.	.
NC_019458.2	3444718	A	ATT,AT	.	.	.	.	.	.
NC_019458.2	3444768	ATCTGATG	A	.	.	.	.	.	.
NC_019458.2	3444794	A	G	.	.	.	.	.	.
NC_019458.2	3444887	C	T	.	.	.	.	.	.
NC_019458.2	3444893	T	C	.	.	.	.	.	.
NC_019458.2	3444973	A	C	.	.	.	.	.	.
NC_019458.2	3444985	C	A	.	.	.	.	.	.
NC_019458.2	3445004	A	G	.	.	.	.	.	.
NC_019458.2	3445005	G	A	.	.	.	.	.	.
NC_019458.2	3445006	A	G	.	.	.	.	.	.
NC_019458.2	3445039	T	G	.	.	.	.	.	.
NC_019458.2	3445065	A	T	.	.	.	.	.	.
NC_019458.2	3445069	T	C,*	.	.	.	.	.	.
NC_019458.2	3445071	C	T	.	.	.	.	.	.
NC_019458.2	3445098	A	C	.	.	.	.	.	.
NC_019458.2	3445135	A	G	.	.	.	.	.	.
NC_019458.2	3445138	T	C	.	.	.	.	.	.
NC_019458.2	3445141	AT	A	.	.	.	.	.	.
NC_019458.2	3445182	G	T	.	.	.	.	.	.
NC_019458.2	3445202	T	A	.	.	.	.	.	.
NC_019458.2	3445203	C	G	.	.	.	.	.	.
NC_019458.2	3445227	A	G	.	.	.	.	.	.
NC_019458.2	3445237	A	T	.	.	.	.	.	.
NC_019458.2	3445244	A	G	.	.	.	.	.	.
NC_019458.2	3445256	A	G	.	.	.	.	.	.
NC_019458.2	3445281	A	T	.	.	.	.	.	.
NC_019458.2	3445381	C	T	.	.	.	.	.	.
NC_019458.2	3445415	A	G	.	.	.	.	.	.
NC_019458.2	3445473	C	T	.	.	.	.	.	.
NC_019458.2	3445496	A	G	.	.	.	.	.	.
NC_019458.2	3445519	A	T	.	.	.	.	.	.
NC_019458.2	3445544	T	A	.	.	.	.	.	.
NC_019458.2	3445565	A	C	.	.	.	.	.	.
NC_019458.2	3445566	G	A	.	.	.	.	.	.
NC_019458.2	3445595	A	G	.	.	.	.	.	.
NC_019458.2	3445611	G	T	.	.	.	.	.	.
NC_019458.2	3445626	C	G	.	.	.	.	.	.
NC_019458.2	3445633	T	C	.	.	.	.	.	.
NC_019458.2	3445661	A	C	.	.	.	.	.	.
NC_019458.2	3445686	G	A	.	.	.	.	.	.
NC_019458.2	3445687	T	C	.	.	.	.	.	.
NC_019458.2	3445719	T	TAAC	.	.	.	.	.	.
NC_019458.2	3445726	C	T	.	.	.	.	.	.
NC_019458.2	3445734	G	A	.	.	.	.	.	.
NC_019458.2	3445740	G	T	.	.	.	.	.	.
NC_019458.2	3445750	C	CCA	.	.	.	.	.	.
NC_019458.2	3445754	G	C	.	.	.	.	.	.
NC_019458.2	3445756	C	CTT,CT	.	.	.	.	.	.
NC_019458.2	3445757	T	TC	.	.	.	.	.	.
NC_019458.2	3445766	T	C	.	.	.	.	.	.
NC_019458.2	3445769	T	TTTC	.	.	.	.	.	.
NC_019458.2	3445813	A	C,T	.	.	.	.	.	.
NC_019458.2	3445823	C	T	.	.	.	.	.	.
NC_019458.2	3445840	G	A	.	.	.	.	.	.
NC_019458.2	3445859	G	A	.	.	.	.	.	.
NC_019458.2	3445881	C	G	.	.	.	.	.	.
NC_019458.2	3445888	G	A	.	.	.	.	.	.
NC_019458.2	3445895	C	G	.	.	.	.	.	.
NC_019458.2	3445896	A	G	.	.	.	.	.	.
NC_019458.2	3445903	C	A	.	.	.	.	.	.
NC_019458.2	3445918	G	T	.	.	.	.	.	.
NC_019458.2	3445941	C	T	.	.	.	.	.	.
NC_019458.2	3445950	C	A	.	.	.	.	.	.
NC_019458.2	3445984	T	C	.	.	.	.	.	.
NC_019458.2	3446002	C	G	.	.	.	.	.	.
NC_019458.2	3446024	T	C	.	.	.	.	.	.
NC_019458.2	3446025	G	A	.	.	.	.	.	.
NC_019458.2	3446031	A	G	.	.	.	.	.	.
NC_019458.2	3446063	G	C	.	.	.	.	.	.
NC_019458.2	3446082	A	G	.	.	.	.	.	.
NC_019458.2	3446093	T	C	.	.	.	.	.	.
NC_019458.2	3446134	T	TTA	.	.	.	.	.	.
NC_019458.2	3446139	A	ATT	.	.	.	.	.	.
NC_019458.2	3446141	T	A,*	.	.	.	.	.	.
NC_019458.2	3446148	G	T	.	.	.	.	.	.
NC_019458.2	3446161	T	C	.	.	.	.	.	.
NC_019458.2	3446278	A	G	.	.	.	.	.	.
NC_019458.2	3446287	C	T	.	.	.	.	.	.
NC_019458.2	3446310	A	G	.	.	.	.	.	.
NC_019458.2	3446312	G	A	.	.	.	.	.	.
NC_019458.2	3446333	A	G	.	.	.	.	.	.
NC_019458.2	3446334	T	C	.	.	.	.	.	.
NC_019458.2	3446360	C	T	.	.	.	.	.	.
NC_019458.2	3446365	G	T	.	.	.	.	.	.
NC_019458.2	3446369	T	G,C	.	.	.	.	.	.
NC_019458.2	3446373	T	TCAGCAGCAA	.	.	.	.	.	.
NC_019458.2	3446374	T	C	.	.	.	.	.	.
NC_019458.2	3446393	A	G	.	.	.	.	.	.
NC_019458.2	3446416	C	T	.	.	.	.	.	.
NC_019458.2	3446456	C	CATT	.	.	.	.	.	.
NC_019458.2	3446515	T	A	.	.	.	.	.	.
NC_019458.2	3446527	T	C	.	.	.	.	.	.
NC_019458.2	3446558	A	T	.	.	.	.	.	.
NC_019458.2	3446594	A	G	.	.	.	.	.	.
NC_019458.2	3446627	C	T	.	.	.	.	.	.
NC_019458.2	3446645	G	A	.	.	.	.	.	.
NC_019458.2	3446655	T	C	.	.	.	.	.	.
NC_019458.2	3446658	G	A	.	.	.	.	.	.
NC_019458.2	3446671	G	T	.	.	.	.	.	.
NC_019458.2	3446688	C	CCT	.	.	.	.	.	.
NC_019458.2	3446704	A	G	.	.	.	.	.	.
NC_019458.2	3446724	A	T	.	.	.	.	.	.
NC_019458.2	3446733	A	G	.	.	.	.	.	.
NC_019458.2	3446770	C	T	.	.	.	.	.	.
NC_019458.2	3446781	G	A	.	.	.	.	.	.
NC_019458.2	3446805	TA	T	.	.	.	.	.	.
NC_019458.2	3446807	GGCATATT	G	.	.	.	.	.	.
NC_019458.2	3446817	AATG	A	.	.	.	.	.	.
NC_019458.2	3446824	ATTT	A	.	.	.	.	.	.
NC_019458.2	3446830	C	G	.	.	.	.	.	.
NC_019458.2	3446833	A	AAGTC	.	.	.	.	.	.
NC_019458.2	3446836	T	TCAGTC	.	.	.	.	.	.
NC_019458.2	3446840	T	TCCGACTC	.	.	.	.	.	.
NC_019458.2	3446843	T	TGCGA	.	.	.	.	.	.
NC_019458.2	3446845	C	CCCTTG,CCTCCTTTATCTTTGTTAATATAG,CCTCCTTTATCTTTGTTAATATAGGGTATCA	.	.	.	.	.	.
NC_019458.2	3446850	G	GTTAATA	.	.	.	.	.	.
NC_019458.2	3447020	G	A	.	.	.	.	.	.
NC_019458.2	3447024	G	T	.	.	.	.	.	.
NC_019458.2	3447055	T	C	.	.	.	.	.	.
NC_019458.2	3447098	T	C	.	.	.	.	.	.
NC_019458.2	3447105	T	G	.	.	.	.	.	.
NC_019458.2	3447184	A	G	.	.	.	.	.	.
NC_019458.2	3447207	T	G	.	.	.	.	.	.
NC_019458.2	3447233	G	T	.	.	.	.	.	.
NC_019458.2	3447235	T	C	.	.	.	.	.	.
NC_019458.2	3447244	T	C	.	.	.	.	.	.
NC_019458.2	3447285	A	G	.	.	.	.	.	.
NC_019458.2	3447319	T	C	.	.	.	.	.	.
NC_019458.2	3447332	T	C	.	.	.	.	.	.
NC_019458.2	3447400	GC	G	.	.	.	.	.	.
NC_019458.2	3447514	C	T	.	.	.	.	.	.
NC_019458.2	3447589	T	TA	.	.	.	.	.	.
NC_019458.2	3447705	G	A	.	.	.	.	.	.
NC_019458.2	3447836	C	A	.	.	.	.	.	.
NC_019458.2	3447971	C	T	.	.	.	.	.	.
NC_019458.2	3448006	G	A	.	.	.	.	.	.
NC_019458.2	3448059	C	A	.	.	.	.	.	.
NC_019458.2	3448062	T	C	.	.	.	.	.	.
NC_019458.2	3448102	C	CA	.	.	.	.	.	.
NC_019458.2	3448224	G	C	.	.	.	.	.	.
NC_019458.2	3448285	A	ACACTGGCTGGCATCTGTCTTCCC	.	.	.	.	.	.
NC_019458.2	3448334	C	T	.	.	.	.	.	.
NC_019458.2	3448486	C	G	.	.	.	.	.	.
NC_019458.2	3448577	T	G	.	.	.	.	.	.
NC_019458.2	3448670	C	T	.	.	.	.	.	.
NC_019458.2	3448683	G	A	.	.	.	.	.	.
NC_019458.2	3448740	T	C	.	.	.	.	.	.
NC_019458.2	3448752	G	A	.	.	.	.	.	.
NC_019458.2	3448769	T	C	.	.	.	.	.	.
NC_019458.2	3448782	C	T	.	.	.	.	.	.
NC_019458.2	3448793	C	G	.	.	.	.	.	.
NC_019458.2	3448867	G	A	.	.	.	.	.	.
NC_019458.2	3448906	A	C	.	.	.	.	.	.
NC_019458.2	3448948	T	A	.	.	.	.	.	.
NC_019458.2	3449002	C	T	.	.	.	.	.	.
NC_019458.2	3449005	G	A	.	.	.	.	.	.
NC_019458.2	3449048	G	A	.	.	.	.	.	.
NC_019458.2	3449068	C	G	.	.	.	.	.	.
NC_019458.2	3449109	C	G	.	.	.	.	.	.
NC_019458.2	3449172	T	C	.	.	.	.	.	.
NC_019458.2	3449198	T	C	.	.	.	.	.	.
NC_019458.2	3449348	G	A	.	.	.	.	.	.
NC_019458.2	3449381	C	T	.	.	.	.	.	.
NC_019458.2	3449433	C	T	.	.	.	.	.	.
NC_019458.2	3449463	C	T	.	.	.	.	.	.
NC_019458.2	3449499	C	T	.	.	.	.	.	.
NC_019458.2	3449500	A	G	.	.	.	.	.	.
NC_019458.2	3449523	C	A	.	.	.	.	.	.
NC_019458.2	3449534	A	G	.	.	.	.	.	.
NC_019458.2	3449547	C	T	.	.	.	.	.	.
NC_019458.2	3449551	T	C	.	.	.	.	.	.
NC_019458.2	3449562	T	C	.	.	.	.	.	.
NC_019458.2	3449591	A	G	.	.	.	.	.	.
NC_019458.2	3449598	G	A	.	.	.	.	.	.
NC_019458.2	3449606	A	G	.	.	.	.	.	.
NC_019458.2	3449608	A	G	.	.	.	.	.	.
NC_019458.2	3449609	C	A	.	.	.	.	.	.
NC_019458.2	3449619	G	A	.	.	.	.	.	.
NC_019458.2	3449624	C	T	.	.	.	.	.	.
NC_019458.2	3449686	A	G	.	.	.	.	.	.
NC_019458.2	3449694	TTTG	T	.	.	.	.	.	.
NC_019458.2	3449695	T	C,*	.	.	.	.	.	.
NC_019458.2	3449700	G	GGCA	.	.	.	.	.	.
NC_019458.2	3449726	C	T	.	.	.	.	.	.
NC_019458.2	3449740	C	T	.	.	.	.	.	.
NC_019458.2	3449751	C	T	.	.	.	.	.	.
NC_019458.2	3449762	A	G	.	.	.	.	.	.
NC_019458.2	3449770	T	C	.	.	.	.	.	.
NC_019458.2	3449778	G	T	.	.	.	.	.	.
NC_019458.2	3449836	T	C	.	.	.	.	.	.
NC_019458.2	3449905	G	GT	.	.	.	.	.	.
NC_019458.2	3449982	C	T	.	.	.	.	.	.
NC_019458.2	3450130	T	C	.	.	.	.	.	.
NC_019458.2	3450331	T	C	.	.	.	.	.	.
NC_019458.2	3450379	T	C	.	.	.	.	.	.
NC_019458.2	3450403	C	T	.	.	.	.	.	.
NC_019458.2	3450454	G	A	.	.	.	.	.	.
NC_019458.2	3450584	G	A	.	.	.	.	.	.
NC_019458.2	3450715	C	T	.	.	.	.	.	.
NC_019458.2	3450746	G	A	.	.	.	.	.	.
NC_019458.2	3450804	T	C	.	.	.	.	.	.
NC_019458.2	3450811	G	A	.	.	.	.	.	.
NC_019458.2	3450902	C	T	.	.	.	.	.	.
NC_019458.2	3450903	A	G	.	.	.	.	.	.
NC_019458.2	3450976	C	T	.	.	.	.	.	.
NC_019458.2	3451065	C	T	.	.	.	.	.	.
NC_019458.2	3451145	C	T	.	.	.	.	.	.
NC_019458.2	3451211	A	G	.	.	.	.	.	.
NC_019458.2	3451312	T	C	.	.	.	.	.	.
NC_019458.2	3451336	G	T	.	.	.	.	.	.
NC_019458.2	3451343	A	G	.	.	.	.	.	.
NC_019458.2	3451362	G	A	.	.	.	.	.	.
NC_019458.2	3451379	A	C	.	.	.	.	.	.
NC_019458.2	3451381	C	T	.	.	.	.	.	.
NC_019458.2	3451382	A	G	.	.	.	.	.	.
NC_019458.2	3451457	C	T	.	.	.	.	.	.
NC_019458.2	3451467	G	A	.	.	.	.	.	.
NC_019458.2	3451487	T	C	.	.	.	.	.	.
NC_019458.2	3451500	G	A	.	.	.	.	.	.
NC_019458.2	3451540	C	T	.	.	.	.	.	.
NC_019458.2	3451559	T	C	.	.	.	.	.	.
NC_019458.2	3451591	A	T,C	.	.	.	.	.	.
NC_019458.2	3451633	A	G	.	.	.	.	.	.
NC_019458.2	3451634	A	C	.	.	.	.	.	.
NC_019458.2	3451671	T	C	.	.	.	.	.	.
NC_019458.2	3451681	A	G	.	.	.	.	.	.
NC_019458.2	3451711	TA	T	.	.	.	.	.	.
NC_019458.2	3451738	G	A	.	.	.	.	.	.
NC_019458.2	3451931	C	A	MLPH	HIGH	stop_gained	14	E/*	Gag/Tag
NC_019458.2	3451998	A	G	.	.	.	.	.	.
NC_019458.2	3452031	A	G	.	.	.	.	.	.
NC_019458.2	3452164	AT	A	.	.	.	.	.	.
NC_019458.2	3452167	A	G	.	.	.	.	.	.
NC_019458.2	3452202	T	C	.	.	.	.	.	.
NC_019458.2	3452261	G	A	.	.	.	.	.	.
NC_019458.2	3452266	A	T	.	.	.	.	.	.
NC_019458.2	3452281	T	C	.	.	.	.	.	.
NC_019458.2	3452344	G	A	.	.	.	.	.	.
NC_019458.2	3452409	T	C	.	.	.	.	.	.
NC_019458.2	3452420	G	A	.	.	.	.	.	.
NC_019458.2	3452502	A	T	.	.	.	.	.	.
NC_019458.2	3452525	A	G	.	.	.	.	.	.
NC_019458.2	3452527	C	T	.	.	.	.	.	.
NC_019458.2	3452559	G	GC,GCC	.	.	.	.	.	.
NC_019458.2	3452565	C	CA	.	.	.	.	.	.
NC_019458.2	3452613	T	C	.	.	.	.	.	.
NC_019458.2	3452857	C	T	.	.	.	.	.	.
NC_019458.2	3452870	C	T	.	.	.	.	.	.
NC_019458.2	3452887	T	C	.	.	.	.	.	.
NC_019458.2	3452952	C	T	.	.	.	.	.	.
NC_019458.2	3452993	G	A	.	.	.	.	.	.
NC_019458.2	3453023	A	G	.	.	.	.	.	.
NC_019458.2	3453068	A	ATTT,AT	.	.	.	.	.	.
NC_019458.2	3453075	A	T	.	.	.	.	.	.
NC_019458.2	3453117	G	A	.	.	.	.	.	.
NC_019458.2	3453132	C	T	.	.	.	.	.	.
NC_019458.2	3453144	A	C	.	.	.	.	.	.
NC_019458.2	3453165	A	G	.	.	.	.	.	.
NC_019458.2	3453452	T	C	.	.	.	.	.	.
NC_019458.2	3453484	C	T	.	.	.	.	.	.
NC_019458.2	3453499	A	G	.	.	.	.	.	.
NC_019458.2	3453531	A	T	.	.	.	.	.	.
NC_019458.2	3453612	G	A	.	.	.	.	.	.
NC_019458.2	3453771	G	A	.	.	.	.	.	.
NC_019458.2	3453856	T	C	.	.	.	.	.	.
NC_019458.2	3453879	A	G	.	.	.	.	.	.
NC_019458.2	3453902	C	T	.	.	.	.	.	.
NC_019458.2	3453987	G	A	.	.	.	.	.	.
NC_019458.2	3453998	G	A	.	.	.	.	.	.
NC_019458.2	3454015	A	AC	.	.	.	.	.	.
NC_019458.2	3454018	A	AC,ACCCC	.	.	.	.	.	.
NC_019458.2	3454025	CCG	C	.	.	.	.	.	.
NC_019458.2	3454026	CG	CCCAG,*	.	.	.	.	.	.
NC_019458.2	3454027	G	C,A,*	.	.	.	.	.	.
NC_019458.2	3454029	C	A	.	.	.	.	.	.
NC_019458.2	3454049	C	G	.	.	.	.	.	.
NC_019458.2	3454109	C	T	.	.	.	.	.	.
NC_019458.2	3454177	T	C	.	.	.	.	.	.
NC_019458.2	3454217	C	T	.	.	.	.	.	.
NC_019458.2	3454285	C	T	.	.	.	.	.	.
NC_019458.2	3454306	C	T	.	.	.	.	.	.
NC_019458.2	3454333	G	T	.	.	.	.	.	.
NC_019458.2	3454340	C	T	.	.	.	.	.	.
NC_019458.2	3454346	C	A	.	.	.	.	.	.
NC_019458.2	3454421	C	T	.	.	.	.	.	.
NC_019458.2	3454422	G	C	.	.	.	.	.	.
NC_019458.2	3454428	C	T	.	.	.	.	.	.
NC_019458.2	3454441	G	A	.	.	.	.	.	.
NC_019458.2	3454504	G	T	.	.	.	.	.	.
NC_019458.2	3454537	C	T	.	.	.	.	.	.
NC_019458.2	3454550	TCAGTGAGTTGATGAAGTGCAGCAGAAG	T	.	.	.	.	.	.
NC_019458.2	3454660	C	CT	.	.	.	.	.	.
NC_019458.2	3454661	T	TC	.	.	.	.	.	.
NC_019458.2	3454672	T	TCC	.	.	.	.	.	.
NC_019458.2	3454701	GTTT	G,GTTTTT,GTTTT	.	.	.	.	.	.
NC_019458.2	3454750	C	A	.	.	.	.	.	.
NC_019458.2	3454774	C	A	.	.	.	.	.	.
NC_019458.2	3454777	A	G	.	.	.	.	.	.
NC_019458.2	3454925	C	T	.	.	.	.	.	.
NC_019458.2	3454953	C	T	.	.	.	.	.	.
NC_019458.2	3454969	G	T	.	.	.	.	.	.
NC_019458.2	3455006	G	T	.	.	.	.	.	.
NC_019458.2	3455034	T	G	.	.	.	.	.	.
NC_019458.2	3455103	G	A	.	.	.	.	.	.
NC_019458.2	3455134	C	A	.	.	.	.	.	.
NC_019458.2	3455219	G	T	.	.	.	.	.	.
NC_019458.2	3455235	C	T	.	.	.	.	.	.
NC_019458.2	3455284	C	T	.	.	.	.	.	.
NC_019458.2	3455288	G	GTTGGAGAAGACTC	.	.	.	.	.	.
NC_019458.2	3455306	T	G	.	.	.	.	.	.
NC_019458.2	3455350	A	G	.	.	.	.	.	.
NC_019458.2	3455367	T	C	.	.	.	.	.	.
NC_019458.2	3455376	A	T	.	.	.	.	.	.
NC_019458.2	3455380	T	C	.	.	.	.	.	.
NC_019458.2	3455389	A	G	.	.	.	.	.	.
NC_019458.2	3455395	C	T	.	.	.	.	.	.
NC_019458.2	3455402	C	G	.	.	.	.	.	.
NC_019458.2	3455435	A	C	.	.	.	.	.	.
NC_019458.2	3455460	A	G	.	.	.	.	.	.
NC_019458.2	3455476	GACAGAGGATGAGATAGTTGGATGGCACTGCTGAAAAGATGGACATGCATT	G	.	.	.	.	.	.
NC_019458.2	3455523	CATTACAGAGGATGAGATAGTTGGATGGCACTGCTGACAAGATGGACATGCATT	C,*	.	.	.	.	.	.
NC_019458.2	3455593	A	G	.	.	.	.	.	.
NC_019458.2	3455607	A	G	.	.	.	.	.	.
NC_019458.2	3455619	T	G	.	.	.	.	.	.
NC_019458.2	3455622	A	G	.	.	.	.	.	.
NC_019458.2	3455641	T	C	.	.	.	.	.	.
NC_019458.2	3455657	T	C	.	.	.	.	.	.
NC_019458.2	3455716	ATCCATTTCTCTGTTGATGGACATTTAGGTTGCTAAAGC	A	.	.	.	.	.	.
NC_019458.2	3455755	TCCATTTCTCTGTTGGTGGACATTTAGGTTGCTAAAGC	T	.	.	.	.	.	.
NC_019458.2	3455844	C	T	.	.	.	.	.	.
NC_019458.2	3455850	T	C	.	.	.	.	.	.
NC_019458.2	3455851	A	G	.	.	.	.	.	.
NC_019458.2	3455861	G	C	.	.	.	.	.	.
NC_019458.2	3455874	A	G	.	.	.	.	.	.
NC_019458.2	3455890	T	G	.	.	.	.	.	.
NC_019458.2	3455896	G	A	.	.	.	.	.	.
NC_019458.2	3455899	T	C	.	.	.	.	.	.
NC_019458.2	3455912	C	T	.	.	.	.	.	.
NC_019458.2	3455990	C	T	.	.	.	.	.	.
NC_019458.2	3455994	C	A	.	.	.	.	.	.
NC_019458.2	3455997	A	G	.	.	.	.	.	.
NC_019458.2	3455999	G	A	.	.	.	.	.	.
NC_019458.2	3456040	T	C	.	.	.	.	.	.
NC_019458.2	3456049	T	C	.	.	.	.	.	.
NC_019458.2	3456117	G	T	.	.	.	.	.	.
NC_019458.2	3456225	T	C	.	.	.	.	.	.
NC_019458.2	3456229	A	G	.	.	.	.	.	.
NC_019458.2	3456289	A	G	.	.	.	.	.	.
NC_019458.2	3456299	A	G	.	.	.	.	.	.
NC_019458.2	3456302	G	A	.	.	.	.	.	.
NC_019458.2	3456303	C	T	.	.	.	.	.	.
NC_019458.2	3456387	C	A	.	.	.	.	.	.
NC_019458.2	3456482	A	G	.	.	.	.	.	.
NC_019458.2	3456495	A	G	.	.	.	.	.	.
NC_019458.2	3456564	G	A	.	.	.	.	.	.
NC_019458.2	3456585	A	C	.	.	.	.	.	.
NC_019458.2	3456628	T	TG	.	.	.	.	.	.
NC_019458.2	3456862	C	T	.	.	.	.	.	.
NC_019458.2	3456999	T	C	.	.	.	.	.	.
NC_019458.2	3457002	A	G	.	.	.	.	.	.
NC_019458.2	3457088	C	A	.	.	.	.	.	.
NC_019458.2	3457111	C	T	.	.	.	.	.	.
NC_019458.2	3457112	G	A	.	.	.	.	.	.
NC_019458.2	3457170	A	G	.	.	.	.	.	.
NC_019458.2	3457281	C	T	.	.	.	.	.	.
NC_019458.2	3457728	G	C	.	.	.	.	.	.
NC_019458.2	3457755	G	A	.	.	.	.	.	.
NC_019458.2	3457933	C	T	.	.	.	.	.	.
NC_019458.2	3457936	C	T	.	.	.	.	.	.
NC_019458.2	3457971	G	A	.	.	.	.	.	.
NC_019458.2	3458081	C	A	.	.	.	.	.	.
NC_019458.2	3458151	G	A	.	.	.	.	.	.
NC_019458.2	3458155	G	A	.	.	.	.	.	.
NC_019458.2	3458361	A	G	.	.	.	.	.	.
NC_019458.2	3458530	C	T	.	.	.	.	.	.
NC_019458.2	3458575	C	A	.	.	.	.	.	.
NC_019458.2	3458585	T	TTA	.	.	.	.	.	.
NC_019458.2	3458653	C	CACCGATTTGCCCAAAATGGGCTCCCGAGGACCCAGACCTTCGGTTAGGCTCTCCAGGCG	.	.	.	.	.	.
NC_019458.2	3458758	G	T	.	.	.	.	.	.
NC_019458.2	3459188	G	C,T	.	.	.	.	.	.
NC_019458.2	3459197	G	A	.	.	.	.	.	.
NC_019458.2	3459211	T	C	.	.	.	.	.	.
NC_019458.2	3459212	C	G	.	.	.	.	.	.
NC_019458.2	3459332	C	A	.	.	.	.	.	.
NC_019458.2	3459372	C	CTAACGCGTGGGAACGCCGGCGGGTAAGGGGGACTTTGGAGCGAGAAGCCCCAGCGCCAGGATCGACGCCGCGGGGAGGGTCCCGAGATCTCGCCGGTCAAGAAAAGTCGGCGGAG	.	.	.	.	.	.
NC_019458.2	3459516	ACT	A	.	.	.	.	.	.
NC_019458.2	3459951	ACCGTGCCCGCTTGTCCTTCC	A	.	.	.	.	.	.
NC_019458.2	3460025	G	C	.	.	.	.	.	.
NC_019458.2	3460114	T	C	.	.	.	.	.	.
NC_019458.2	3460138	G	C	.	.	.	.	.	.
NC_019458.2	3460142	C	CA	.	.	.	.	.	.
NC_019458.2	3460147	T	TA	.	.	.	.	.	.
NC_019458.2	3460338	T	A	.	.	.	.	.	.
NC_019458.2	3460390	C	T	.	.	.	.	.	.
NC_019458.2	3460476	T	G	.	.	.	.	.	.
NC_019458.2	3460486	G	T	.	.	.	.	.	.
NC_019458.2	3460531	A	G	.	.	.	.	.	.
NC_019458.2	3460567	T	C	.	.	.	.	.	.
NC_019458.2	3460569	G	A	.	.	.	.	.	.
NC_019458.2	3460570	G	C	.	.	.	.	.	.
NC_019458.2	3460576	A	T	.	.	.	.	.	.
NC_019458.2	3460579	T	C	.	.	.	.	.	.
NC_019458.2	3460587	G	A	.	.	.	.	.	.
NC_019458.2	3460640	GAC	G	.	.	.	.	.	.
NC_019458.2	3460652	C	CAT	.	.	.	.	.	.
NC_019458.2	3460661	T	C	.	.	.	.	.	.
NC_019458.2	3460745	TC	T	.	.	.	.	.	.
NC_019458.2	3460756	A	T	.	.	.	.	.	.
NC_019458.2	3460856	C	T	.	.	.	.	.	.
NC_019458.2	3460899	G	A	.	.	.	.	.	.
NC_019458.2	3460915	A	G	.	.	.	.	.	.
NC_019458.2	3460997	ATTTCATTCTTTTTTGTGGCTGAGTAATATTCCGTTCCATATAATACCACTT	A	.	.	.	.	.	.
NC_019458.2	3461012	G	A,*	.	.	.	.	.	.
NC_019458.2	3461016	CTGAGTAATATTCCGTTCCATATAATACCACTTTTTCATTCTTTTTTATGGT	C,*	.	.	.	.	.	.
NC_019458.2	3461048	TTTTCATTCTTTTTTATGGTTGAGTAATATTCCGTTCCATACAATACCA	T,*	.	.	.	.	.	.
NC_019458.2	3461100	C	CT	.	.	.	.	.	.
NC_019458.2	3461110	C	G	.	.	.	.	.	.
NC_019458.2	3461129	G	A	.	.	.	.	.	.
NC_019458.2	3461145	C	T	.	.	.	.	.	.
NC_019458.2	3461149	G	C	.	.	.	.	.	.
NC_019458.2	3461160	T	C	.	.	.	.	.	.
NC_019458.2	3461171	A	G	.	.	.	.	.	.
NC_019458.2	3461209	T	C	.	.	.	.	.	.
NC_019458.2	3461213	C	T	.	.	.	.	.	.
NC_019458.2	3461248	G	A	.	.	.	.	.	.
NC_019458.2	3461270	C	T	.	.	.	.	.	.
NC_019458.2	3461287	C	T	.	.	.	.	.	.
NC_019458.2	3461308	C	T	.	.	.	.	.	.
NC_019458.2	3461354	A	G	.	.	.	.	.	.
NC_019458.2	3461424	G	T	.	.	.	.	.	.
NC_019458.2	3461443	T	C	.	.	.	.	.	.
NC_019458.2	3461462	G	A	.	.	.	.	.	.
NC_019458.2	3461729	C	T	.	.	.	.	.	.
NC_019458.2	3461766	A	T	.	.	.	.	.	.
NC_019458.2	3461814	C	T	.	.	.	.	.	.
NC_019458.2	3461913	T	C	.	.	.	.	.	.
NC_019458.2	3461918	G	C	.	.	.	.	.	.
NC_019458.2	3461976	G	A	.	.	.	.	.	.
NC_019458.2	3462051	C	T	.	.	.	.	.	.
NC_019458.2	3462137	GTT	GT,GTTT,G	.	.	.	.	.	.
NC_019458.2	3462163	T	A	.	.	.	.	.	.
NC_019458.2	3462165	C	T	.	.	.	.	.	.
NC_019458.2	3462188	T	A	.	.	.	.	.	.
NC_019458.2	3462259	T	C	.	.	.	.	.	.
NC_019458.2	3462310	G	C	.	.	.	.	.	.
NC_019458.2	3462348	A	G	.	.	.	.	.	.
NC_019458.2	3462368	T	C	.	.	.	.	.	.
NC_019458.2	3462401	C	T	.	.	.	.	.	.
NC_019458.2	3462407	A	C	.	.	.	.	.	.
NC_019458.2	3462412	C	A	.	.	.	.	.	.
NC_019458.2	3462426	G	T	.	.	.	.	.	.
NC_019458.2	3462443	A	G	.	.	.	.	.	.
NC_019458.2	3462458	T	C	.	.	.	.	.	.
NC_019458.2	3462498	A	G	.	.	.	.	.	.
NC_019458.2	3462525	G	C	.	.	.	.	.	.
NC_019458.2	3462529	G	A	.	.	.	.	.	.
NC_019458.2	3462549	T	C	.	.	.	.	.	.
NC_019458.2	3462550	G	A	.	.	.	.	.	.
NC_019458.2	3462559	G	T	.	.	.	.	.	.
NC_019458.2	3462631	C	T	.	.	.	.	.	.
NC_019458.2	3462654	C	T	.	.	.	.	.	.
NC_019458.2	3462666	A	C	.	.	.	.	.	.
NC_019458.2	3462668	C	T	.	.	.	.	.	.
NC_019458.2	3462685	A	C	.	.	.	.	.	.
NC_019458.2	3462731	T	C	.	.	.	.	.	.
NC_019458.2	3462739	A	G	.	.	.	.	.	.
NC_019458.2	3462749	A	G	.	.	.	.	.	.
NC_019458.2	3462770	C	T	.	.	.	.	.	.
NC_019458.2	3462823	T	C	.	.	.	.	.	.
NC_019458.2	3462831	G	GC	.	.	.	.	.	.
NC_019458.2	3462858	G	A	.	.	.	.	.	.
NC_019458.2	3462880	T	A	.	.	.	.	.	.
NC_019458.2	3462883	TTTG	T	.	.	.	.	.	.
NC_019458.2	3462886	GTTTTT	G,GGTTTTTTTTT,*	.	.	.	.	.	.
NC_019458.2	3462899	T	TC	.	.	.	.	.	.
NC_019458.2	3462924	T	A	.	.	.	.	.	.
NC_019458.2	3462966	T	TTTAAGGTGATATATGTGTGTG	.	.	.	.	.	.
NC_019458.2	3463031	A	G	.	.	.	.	.	.
NC_019458.2	3463034	A	G	.	.	.	.	.	.
NC_019458.2	3463037	C	T	.	.	.	.	.	.
NC_019458.2	3463055	G	A	.	.	.	.	.	.
NC_019458.2	3463057	G	A	.	.	.	.	.	.
NC_019458.2	3463078	A	G	.	.	.	.	.	.
NC_019458.2	3463110	T	G,A	.	.	.	.	.	.
NC_019458.2	3463145	A	G	.	.	.	.	.	.
NC_019458.2	3463153	T	C	.	.	.	.	.	.
NC_019458.2	3463166	A	G	.	.	.	.	.	.
NC_019458.2	3463207	C	T	.	.	.	.	.	.
NC_019458.2	3463212	T	G	.	.	.	.	.	.
NC_019458.2	3463217	T	C	.	.	.	.	.	.
NC_019458.2	3463225	T	C	.	.	.	.	.	.
NC_019458.2	3463283	C	A	.	.	.	.	.	.
NC_019458.2	3463296	A	G	.	.	.	.	.	.
NC_019458.2	3463319	T	C	.	.	.	.	.	.
NC_019458.2	3463332	A	C	.	.	.	.	.	.
NC_019458.2	3463336	C	T	.	.	.	.	.	.
NC_019458.2	3463362	TAA	T	.	.	.	.	.	.
NC_019458.2	3463403	GAT	G	.	.	.	.	.	.
NC_019458.2	3463430	G	A	.	.	.	.	.	.
NC_019458.2	3463447	C	T	.	.	.	.	.	.
NC_019458.2	3463509	G	A	.	.	.	.	.	.
NC_019458.2	3463590	C	T	.	.	.	.	.	.
NC_019458.2	3463595	G	GT	.	.	.	.	.	.
NC_019458.2	3463610	T	G	.	.	.	.	.	.
NC_019458.2	3463615	C	T	.	.	.	.	.	.
NC_019458.2	3463621	G	A	.	.	.	.	.	.
NC_019458.2	3463624	C	T	.	.	.	.	.	.
NC_019458.2	3463645	T	A	.	.	.	.	.	.
NC_019458.2	3463652	C	T	.	.	.	.	.	.
NC_019458.2	3463670	G	A	.	.	.	.	.	.
NC_019458.2	3463711	T	C	.	.	.	.	.	.
NC_019458.2	3463769	A	G	.	.	.	.	.	.
NC_019458.2	3463883	A	G	.	.	.	.	.	.
NC_019458.2	3463897	T	C	.	.	.	.	.	.
NC_019458.2	3463974	C	T	.	.	.	.	.	.
NC_019458.2	3463975	A	G	.	.	.	.	.	.
NC_019458.2	3464013	T	C	.	.	.	.	.	.
NC_019458.2	3464100	TA	T	.	.	.	.	.	.
NC_019458.2	3464187	T	C	.	.	.	.	.	.
NC_019458.2	3464412	T	C	.	.	.	.	.	.
NC_019458.2	3464427	G	A	.	.	.	.	.	.
[truncated: 4,438 more rows]
